# Supplementary material for: PARROT Ireland: Placental growth factor in Assessment of women with suspected pre-eclampsia to reduce maternal morbidity: a Stepped Wedge Cluster Randomised Control Trial Research Study Protocol
Source: PubMed Central journal article supplement — BMJ Open. 2019 Mar 1;9(2):e023562. doi: 10.1136/bmjopen-2018-023562 (PMC6398700; doi:10.1136/bmjopen-2018-023562), 2019-03-01
Supplement: bmjopen-2018-023562.draft_revisions.pdf [file bmjopen-2018-023562.draft_revisions.pdf]

# BMJ Open

BMJ Open is committed to open peer review. As part of this commitment we make the peer review history of every article we publish publicly available.

When an article is published we post the peer reviewers' comments and the authors' responses online. We also post the versions of the paper that were used during peer review. These are the versions that the peer review comments apply to.

The versions of the paper that follow are the versions that were submitted during the peer review process. They are not the versions of record or the final published versions. They should not be cited or distributed as the published version of this manuscript.

BMJ Open is an open access journal and the full, final, typeset and author-corrected version of record of the manuscript is available on our site with no access controls, subscription charges or pay-per-view fees (<http://bmjopen.bmj.com>).

If you have any questions on BMJ Open's open peer review process please email [editorial.bmjopen@bmj.com](mailto:editorial.bmjopen@bmj.com)

# BMJ Open

## PARROT Ireland: (Placental growth factor in Assessment of women with suspected pre-eclampsia to Reduce maternal morbidity: a Stepped Wedge Cluster Randomised Control Trial) Research Study Protocol

|                               |                                                                                                                                                                                                                                                                                                                                                                                                                                                                                                                                                                                                                                                                                                                                                                                                                                                                                                                                                                                                                                                                                                                                                                                                                                                                                                                                                                                                                                                                                                                                                                                                                                                                                                                                                                                                                                                                                                                                                                                                                                                             |
|-------------------------------|-------------------------------------------------------------------------------------------------------------------------------------------------------------------------------------------------------------------------------------------------------------------------------------------------------------------------------------------------------------------------------------------------------------------------------------------------------------------------------------------------------------------------------------------------------------------------------------------------------------------------------------------------------------------------------------------------------------------------------------------------------------------------------------------------------------------------------------------------------------------------------------------------------------------------------------------------------------------------------------------------------------------------------------------------------------------------------------------------------------------------------------------------------------------------------------------------------------------------------------------------------------------------------------------------------------------------------------------------------------------------------------------------------------------------------------------------------------------------------------------------------------------------------------------------------------------------------------------------------------------------------------------------------------------------------------------------------------------------------------------------------------------------------------------------------------------------------------------------------------------------------------------------------------------------------------------------------------------------------------------------------------------------------------------------------------|
| Journal:                      | <i>BMJ Open</i>                                                                                                                                                                                                                                                                                                                                                                                                                                                                                                                                                                                                                                                                                                                                                                                                                                                                                                                                                                                                                                                                                                                                                                                                                                                                                                                                                                                                                                                                                                                                                                                                                                                                                                                                                                                                                                                                                                                                                                                                                                             |
| Manuscript ID                 | bmjopen-2018-023562                                                                                                                                                                                                                                                                                                                                                                                                                                                                                                                                                                                                                                                                                                                                                                                                                                                                                                                                                                                                                                                                                                                                                                                                                                                                                                                                                                                                                                                                                                                                                                                                                                                                                                                                                                                                                                                                                                                                                                                                                                         |
| Article Type:                 | Protocol                                                                                                                                                                                                                                                                                                                                                                                                                                                                                                                                                                                                                                                                                                                                                                                                                                                                                                                                                                                                                                                                                                                                                                                                                                                                                                                                                                                                                                                                                                                                                                                                                                                                                                                                                                                                                                                                                                                                                                                                                                                    |
| Date Submitted by the Author: | 12-Apr-2018                                                                                                                                                                                                                                                                                                                                                                                                                                                                                                                                                                                                                                                                                                                                                                                                                                                                                                                                                                                                                                                                                                                                                                                                                                                                                                                                                                                                                                                                                                                                                                                                                                                                                                                                                                                                                                                                                                                                                                                                                                                 |
| Complete List of Authors:     | <p>Hayes Ryan, Deirdre; The Irish Centre for Fetal and Neonatal Translational Research (INFANT), UCC, Cork; Dept. of Obstetrics and Gynaecology, University College Cork</p> <p>Hemming, Karla; University of Birmingham, Public Health</p> <p>Brethnach, FIONNUALA; Rotunda Hospital, Royal College of Surgeons in Ireland, Dublin</p> <p>Cotter, Amanda; Department of Obstetrics and Gynaecology, Graduate Entry Medical School, University of Limerick</p> <p>Devane, Declan; HRB Trials Methodology Research Network; National Univeristy of Ireland, Galway</p> <p>Hunter, Alyson; Royal Maternity Hospital, Grosvenor Road, BT12 6BB</p> <p>McAuliffe, Fionnuala; Perinatal Research Centre, Obstetrics &amp; Gynaecology, School of Medicine, University College Dublin, National Maternity Hospital, Dublin, Ireland</p> <p>Morrison, John; National University of Ireland Galway, Obstetrics and Gynaecology</p> <p>Murphy, Deirdre; Trinity College Dublin &amp; Coombe Women &amp; Infants University Hospital Dublin 8, Republic of Ireland</p> <p>Khashan, Ali; University College Cork, Department of Epidemiology and Public Health; The Irish Centre for Fetal and Neonatal Translational Research (INFANT), University College Cork, Ireland</p> <p>McElroy, Brendan; Economics Department, University College Cork, Cork, Ireland</p> <p>Murphy, A; University College Cork, Economics Department</p> <p>Dempsey, E; University College Cork, Department of Paediatrics and Child Health; The Irish Centre for Fetal and Neonatal Translational Research (INFANT), University College Cork, Ireland</p> <p>O'Donoghue, Keelin; Dept. of Obstetrics and Gynaecology, University College Cork; The Irish Centre for Fetal and Neonatal Translational Research (INFANT), University College Cork, Ireland</p> <p>Kenny, Louise; University of Liverpool School of Life Sciences, Department of Women's and Children's Health; The Irish Centre for Fetal and Neonatal Translational Research (INFANT), University College Cork, Ireland</p> |
| Keywords:                     | Pre-eclampsia, placental growth factor, stepped wedge cluster randomised trial, point of care diagnostic test                                                                                                                                                                                                                                                                                                                                                                                                                                                                                                                                                                                                                                                                                                                                                                                                                                                                                                                                                                                                                                                                                                                                                                                                                                                                                                                                                                                                                                                                                                                                                                                                                                                                                                                                                                                                                                                                                                                                               |

1  
2  
3  
4  
5  
6  
7  
8  
9  
10  
11  
12  
13  
14  
15  
16  
17  
18  
19  
20  
21  
22  
23  
24  
25  
26  
27  
28  
29  
30  
31  
32  
33  
34  
35  
36  
37  
38  
39  
40  
41  
42  
43  
44  
45  
46  
47  
48  
49  
50  
51  
52  
53  
54  
55  
56  
57  
58  
59  
60

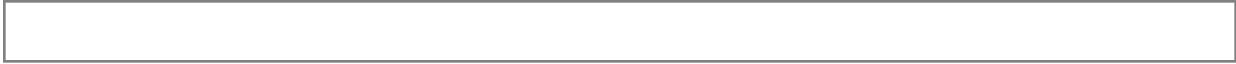

SCHOLARONE™  
Manuscripts

1  
2  
3 1 **PARROT Ireland: (P**lacental growth factor in **A**ssessment  
4 2 of women with suspected pre-eclampsia to **R**educe  
5 3 maternal morbidity: a Stepped Wedge Cluster **R**andomised  
6 4 **C**ontrol **T**rial) Research Study Protocol  
7  
8  
9  
10  
11  
12  
13  
14  
15  
16  
17  
18  
19  
20  
21  
22  
23  
24  
25  
26  
27  
28  
29  
30  
31  
32  
33  
34  
35  
36  
37  
38  
39  
40  
41  
42  
43  
44  
45  
46  
47  
48  
49  
50  
51  
52  
53  
54  
55  
56  
57  
58  
59  
60

8 \*Corresponding author  
9 Deirdre Hayes-Ryan<sup>1,2\*</sup>  
10 Email: deirdre.hayesryan@ucc.ie

11  
12 Karla Hemming<sup>3</sup>  
13 Email: k.hemming@bham.ac.uk

14  
15 Fionnuala Breathnaeach<sup>4</sup>  
16 Email: fbreathnach@rcsi.ie

17  
18 Amanda Cotter<sup>5</sup>  
19 Email: amanda.cotter@ul.ie

20  
21 Declan Devane<sup>1,6,7</sup>  
22 Email: declan.devane@nuigalway.ie

23  
24 Ali Hunter<sup>8</sup>  
25 Email: alyson.hunter@belfasttrust.hscni.net

26  
27 Fionnuala M McAuliffe<sup>9</sup>  
28 Email: fionnuala.mcauliffe@ucd.ie

29  
30 John Morrisson<sup>7</sup>  
31 Email: john.morrisson@nuigalway.ie

32  
33 Deirdre J Murphy<sup>10</sup>  
34 Email: MURPHYD4@tcd.ie

35  
36 Ali Kashan<sup>1,11</sup>  
37 Email: a.khashan@ucc.ie

38  
39 Brendan McElroy<sup>12</sup>  
40 Email: b.mcelroy@ucc.ie

41  
42 Aileen Murphy<sup>12</sup>  
43 Email: aileen.murphy@ucc.ie

44  
45 Eugene Dempsey<sup>1,2</sup>  
46 Email: G.Dempsey@ucc.ie

47  
48 Keelin O'Donoghue<sup>1,2</sup>  
49 Email: k.odonoghue@ucc.ie

1  
2  
3  
4  
5  
6  
7  
8  
9  
10  
11  
12  
13  
14  
15  
16  
17  
18  
19  
20  
21  
22  
23  
24  
25  
26  
27  
28  
29  
30  
31  
32  
33  
34  
35  
36  
37  
38  
39  
40  
41  
42  
43  
44  
45  
46  
47  
48  
49  
50  
51  
52  
53  
54  
55  
56  
57  
58  
59  
60

1 Louise C Kenny<sup>1,13</sup>  
2 Email: L.Kenny@ucc.ie

5 <sup>1</sup>The Irish Centre for Fetal and Neonatal Translational Research (INFANT),  
6 University College Cork, Ireland

7 <sup>2</sup>Cork University Maternity Hospital, Cork, Ireland

8 <sup>3</sup>University of Birmingham, United Kingdom

9 <sup>4</sup>Rotunda Hospital, Parnell Square W, Dublin 1, Ireland

10 <sup>5</sup>University Maternity Hospital Limerick

11 <sup>6</sup>HRB Trials Methodology Research Network

12 <sup>7</sup>National University of Ireland, Galway, Ireland

13 <sup>8</sup>Royal Jubilee Maternity Hospital, Belfast, Northern Ireland

14 <sup>9</sup>Perinatal Research Centre, Obstetrics & Gynaecology, School of  
15 Medicine, University College Dublin, National Maternity Hospital,  
16 Dublin, Ireland

17 <sup>10</sup>Trinity College Dublin & Coombe Women & Infants University  
18 Hospital Dublin 8, Republic of Ireland

19 <sup>11</sup> School of Public Health, University College Cork, Cork, Ireland

20 <sup>12</sup>Economics Department, University College Cork, Cork, Ireland

21 <sup>13</sup> Department of Women's and Children's Health, Liverpool Women's  
22 Hospital, University of Liverpool, UK

review only

## 1 **Abstract**

### 2 **Background**

3 Women presenting with suspected pre-eclampsia are currently triaged on the basis of  
4 hypertension and dipstick proteinuria. This may result in significant false positive and  
5 negative diagnoses resulting in increased morbidity or unnecessary intervention. Recent  
6 data suggests that placental growth factor testing may be a useful adjunct in the  
7 management of women presenting with preterm pre-eclampsia. The primary objective of this  
8 trial is to determine if the addition of placental growth factor testing to the current clinical  
9 assessment of women with suspected preterm pre-eclampsia, is beneficial for both mothers  
10 and babies.

### 12 **Methods**

13 This is a multicentre, stepped wedge cluster, randomised trial aiming to recruit 4000 women  
14 presenting with symptoms suggestive of preterm pre-eclampsia between 20 and 36+6  
15 weeks' gestation. The intervention of an unblinded point of care test, performed at  
16 enrolment, will quantify maternal levels of circulating plasma placental growth factor. The  
17 intervention will be rolled out sequentially, based on randomisation, in the seven largest  
18 maternity units on the island of Ireland. Primary outcome is a composite outcome of  
19 maternal morbidity (derived from the modified fullPIERS model). To ensure we are not  
20 reducing maternal morbidity at the expense of earlier delivery and worse neonatal outcomes,  
21 we have established a co-primary outcome which will examine the effect of the intervention  
22 on neonatal morbidity, assessed using a composite neonatal score. Secondary outcomes  
23 include mode of delivery, antenatal detection of growth restriction and use of  
24 antihypertensive agents as well as the health economic impact of incorporation of placental  
25 growth factor testing into routine care.

1

2

### 3 **Discussion**

4 This trial will assess the impact of incorporating placental growth factor measurement to the  
5 current clinical assessment of women with suspected pre-eclampsia prior to 37 weeks'  
6 gestation on maternal, neonatal and health economic outcomes. We hypothesise the  
7 addition of placental growth factor measurement will reduce associated maternal morbidity  
8 and neonatal morbidity, through improved risk stratification, earlier diagnosis and therefore  
9 targeted management of women with the disease and their neonates. If this trial  
10 demonstrates a beneficial impact on maternal morbidity and/or neonatal morbidity there will  
11 be a strong case for incorporating placental growth factor into routine diagnostic testing and  
12 management for women presenting with suspected pre-eclampsia before 37 weeks'  
13 gestation.

14

### 15 **Strengths and limitations of this study**

- 16 - Randomised Trial
- 17 - Multiple sites with wide geographic distribution
- 18 - Stepped wedge design

19

### 20 **Trial registration**

21 Clinical Trials NCT02881073 (26<sup>th</sup> August 2016)

22

### 23 **Keywords**

1  
2  
3 1 Pre-eclampsia, placental growth factor, PIGF, diagnostic test, point of care, stepped wedge  
4 cluster randomised controlled trial  
5  
6  
7  
8  
9  
10  
11  
12

## 13 **Background**

14  
15 6 Pre-eclampsia (PET) is characterised by hypertension and proteinuria, complicates 2-8% of  
16 7 pregnancies, and is associated with significant maternal and neonatal morbidity and  
17 8 mortality (1). Currently women who present with suspected pre-eclampsia are triaged on the  
18 9 basis of hypertension and dipstick proteinuria. Both of these clinical endpoints are subject to  
19 10 observer error and poor test accuracy, with false positive and negative diagnoses of pre-  
20 11 eclampsia occurring in clinical practice (2-5). Current biochemical tests are imperfect at  
21 12 stratifying women for more intensive surveillance as they only identify advanced disease  
22 13 where there is already marked end-organ damage (6). While biomarkers and imaging  
23 14 techniques have been evaluated for improving detection, none have adequate sensitivity  
24 15 and/or specificity for the diagnosis of pre-eclampsia (7).  
25  
26

27  
28  
29  
30  
31  
32  
33  
34  
35  
36  
37 17 Placental growth factor (PIGF) belongs to the vascular endothelial growth factor (VEGF)  
38 18 family and represents a key regulator of angiogenic events in pathological conditions. PIGF  
39 19 exerts its biological function through the binding and activation of the receptor Flt-1. In pre-  
40 20 eclampsia, it is thought that endothelial dysfunction leads to an increased level of a  
41 21 circulating decoy receptor, known as soluble Flt-1, (sFlt-1), a soluble receptor for both  
42 22 VEGF-A and PIGF (8). Circulating levels of sFlt-1 are increased in pre-eclampsia and  
43 23 particularly in the early onset form of the disease, resulting in reduced levels of free VEGF-A  
44 24 and PIGF in the maternal circulation. Thus, the endothelial dysfunction observed in pre-  
45 25 eclampsia may be due to excess neutralisation of VEGF-A and PIGF by circulating sFlt-1.  
46  
47  
48  
49  
50  
51  
52  
53  
54  
55 26 Levine et al. showed that in normal pregnancy, PIGF levels track the development of the  
56  
57  
58  
59  
60



1 placenta, peaking at about 32 weeks' gestation when the placenta is developed fully and  
2 then declining until delivery (9). However, in pre-eclampsia, this rise and fall is considerably  
3 lower throughout pregnancy, and levels are strikingly lower when the condition presents  
4 clinically.

5 The PELICAN study was the first and largest prospective evaluation of PIGF in women  
6 presenting with suspected pre-eclampsia (10). This blinded observational cohort study was  
7 conducted in seven consultant-led maternity units in the UK and Ireland between January  
8 2011 and February 2012. It enrolled women being investigated for suspected pre-eclampsia,  
9 quantified their plasma PIGF using a point of care device, the Alere Triage PIGF test®, but  
10 did not reveal the result to their clinician. The study found that a PIGF value <100 pg/ml, in  
11 women presenting prior to 35 completed weeks' gestation had a negative predictive value of  
12 98% (95% CI, 93 to 99.5) and a positive predictive value of 44% (95% CI, 36 to 52) in  
13 determining those that would require delivery for a confirmed diagnosis of pre-eclampsia  
14 within the next 14 days. The study reported a PIGF <100 pg/ml to be a better predictor than  
15 all other current commonly used predictive tests of pre-eclampsia, either singly or in  
16 combination (blood pressure, urinalysis or biochemical markers) with an area under the ROC  
17 curve for low PIGF of 0.87 compared to 0.76 for the next best predictor.

18 The PROGNOSIS study was a prospective, multicentre, blinded, observational study  
19 conducted in 14 countries from 2011 to 2014 (11). Its aim was to derive and validate a ratio  
20 of serum sFlt-1 to PIGF that would be predictive of the absence or presence of pre-  
21 eclampsia in the short term. It included women with singleton pregnancies from 24 weeks to  
22 36+6 weeks' gestation in whom a clinical suspicion of pre-eclampsia existed. The Elecsys  
23 immunoassay was used to quantify levels of PIGF and sFlt-1. The development cohort of  
24 over 500 participants identified a sFlt-1:PIGF ratio of 38 as having an important predictive  
25 value. The subsequent validation cohort, again with over 500 participants, reported a  
26 negative predictive value of 99.3% (95% CI 97.9–99.9) for ruling out pre-eclampsia within  
27 one week. Interestingly, the same cut off of 38 was predictive of the absence of fetal adverse

1 outcomes within 1 week; negative predictive value of 99.3% [95% CI, 97.9 to 99.9]. The  
2 study showed that an sFlt-1: PIGF ratio of 38 or lower can be used to predict the short-term  
3 absence of pre-eclampsia and adverse fetal events in women in whom the syndrome is  
4 suspected clinically (12). The positive predictive value; a diagnosis of preeclampsia,  
5 eclampsia, or the HELLP syndrome within 4 weeks, was 36.7% (95% CI, 28.4 to 45.7) using  
6 the same sFlt-1: PIGF ratio of 38. Post hoc analysis however showed this was still an  
7 improvement in prediction compared to the use of clinical variables such as blood pressure  
8 and urinalysis alone.

9 NICE (The National Institute for Health and Clinical Excellence, UK) has recently published  
10 guidance on incorporation of PIGF testing, in addition to clinical assessment, in women  
11 presenting with suspected pre-eclampsia from 20-34<sup>6</sup> weeks' gestation. It advises that the  
12 Triage PIGF test or Elecsys immunoassay sFlt-1/PIGF ratio test may be used, in  
13 combination with clinical assessment, to "rule-out" pre-eclampsia in this group of women.  
14 However, it advises that these tests should not yet be used to diagnose pre-eclampsia until  
15 further research is available, specifically on how an abnormal PIGF result would affect  
16 management decisions regarding timing and gestation of delivery and the outcomes  
17 associated with this (13).

18 The objective of this randomised trial is to evaluate the impact of knowledge of PIGF  
19 measurement on clinically relevant outcomes. We hypothesise that adding PIGF  
20 measurement to current clinical assessment of women with suspected pre-eclampsia prior to  
21 37 weeks' gestation will reduce associated maternal morbidity through improved risk  
22 stratification, earlier diagnosis and targeted management of women with the disease. Any  
23 intervention in late pregnancy may have an impact on the fetus. On the one hand, earlier  
24 diagnosis of pre-eclampsia may precipitate earlier delivery and lead to an increase in  
25 neonatal morbidity and mortality secondary to iatrogenic prematurity. Conversely, improved  
26 identification of those neonates at highest risk of imminent placental dysfunction may reduce

1 neonatal morbidity by allowing for timely intervention. It is therefore imperative that full  
2 evaluation of both potential benefit and harm is conducted before PIGF testing is  
3 implemented routinely into clinical practice. If this trial demonstrates a beneficial impact on  
4 maternal morbidity and/or neonatal morbidity, alongside a favourable health economic  
5 assessment, then there would be a strong case for incorporating PIGF testing into routine  
6 clinical investigations for women presenting with suspected pre-eclampsia before 37 weeks'  
7 gestation in a wide variety of healthcare settings.

## 9 **Methods and Design**

### 10 **Study Design**

11 PARROT Ireland is a multi-centre, stepped wedge cluster-controlled trial of PIGF  
12 measurement in women presenting with suspected pre-eclampsia prior to 37 weeks'  
13 gestation. As implementation of a diagnostic test may alter physician management, a cluster  
14 design was chosen rather than individual randomisation. This allows for a change in  
15 management to occur at a hospital rather than at an individual woman level, which is  
16 preferable in trials involving a diagnostic test and allows the clinical influence of the  
17 additional test to be evaluated in a pragmatic fashion (14). Each maternity hospital acts as a  
18 cluster. All clusters commenced the trial in the control arm and in turn, each cluster  
19 transitions at random from the control to the intervention at pre-specified time points. Once a  
20 cluster has changed over to the intervention, it continues as such for the remainder of the  
21 trial so that by the end of the trial all clusters will be in the intervention arm (Figure.1). A  
22 stepped wedge design was chosen so as to increase the social acceptability of the trial to  
23 the 7 hospitals (the stake holders / decision makers in all of the hospitals expressed a desire  
24 to participate in a trial in which they were guaranteed to get the intervention); and because a  
25 trial with just 7 clusters risks baseline imbalance in a parallel design.

1 The trial will continue for a period of twenty-two months, and with seven clusters the interval  
2 between transitions is approximately three months in duration. A restricted method of  
3 randomisation was used to provide a balance in total (expected) number of observations  
4 across intervention and control periods (details below) (15-17). There is a short transition  
5 period of one week whenever a new cluster transitions from control to the intervention. Data  
6 collected during this transition period will not be included in any analysis of outcomes.  
7 Recruitment will stop on a pre-specified fixed date in late April 2019 and the study will end  
8 when the last recruited participant and neonate are discharged and all outcome data  
9 collected.

10

### 11 **Setting & Participants**

12 The trial is being conducted within the Health Research Board Mother and Baby Clinical Trial  
13 Network Collaborative. The Coombe Women and Infants University Hospital Dublin, Cork  
14 University Maternity Hospital, University Maternity Hospital Limerick, The Royal Jubilee  
15 Maternity Hospital Belfast, University College Hospital Galway, The National Maternity  
16 Hospital Dublin and The Rotunda Maternity Hospital Dublin are the seven largest consultant-  
17 led maternity units on the island of Ireland. Combined, they have an annual birth rate of over  
18 44,000, representing over half of the country's total annual births. Women attending these  
19 maternity units who present with suspected pre-term pre-eclampsia are eligible for inclusion  
20 in this trial. Detailed inclusion and exclusion criteria are described (Table 1 & 2).

21

### 22 **Randomisation**

23 The trial statisticians for the study developed a randomisation sequence for site transition  
24 from control to intervention; however, the order of site transitioning is concealed from sites  
25 and principal investigators until 12 weeks prior to the sites transition date. An allocation  
26 sequence was randomly selected (i.e. a cross-over order for the 7 clusters) from a set of  
27 random sequences constrained so that the sum of the total cluster sizes in the intervention  
28 status was similar to the total sum of the cluster sizes in the control status. Similar was

1  
2  
3 1 defined to be a difference in the total sums exposed to intervention and control statuses  
4  
5 2 being no different than the expected middle 25th percentile range of differences. To  
6  
7 3 implement this, 10,000 simulations of possible (unique) allocation sequences were  
8  
9 4 performed. From this, the difference in number exposed to intervention and control for each  
10  
11 5 sequence was determined. An allocation sequence was then selected at random from those  
12  
13 6 falling within the middle 25th percentile range of differences (14-16).  
14  
15 7

## 8 **Control**

9 Eligible women are approached and provided with detailed information about the trial, both  
10  
11 10 verbally and written, by a trained researcher. Eligibility is determined by review of symptoms  
12  
13 11 and signs at the time of presentation to the maternity hospital by the local researcher.  
14  
15 12 Participants are not aware of their maternity hospitals current randomisation prior to their  
16  
17 13 enrolment on the trial. Informed consent is obtained in accordance with ICH - GCP  
18  
19 14 guidelines (18). Once an eligible woman has given written informed consent for inclusion in  
20  
21 15 the study, her maternity hospitals current group allocation is revealed (Figure 2). Participants  
22  
23 16 enrolled in the control arm receive usual hospital care as per National guidelines; these are  
24  
25 17 Health Service Executive/Institute of Obstetrics and Gynaecology Irish guidelines for those  
26  
27 18 in the Republic or the NICE guidelines for those in Northern Ireland (Figure 3a and 3b) (19,  
28  
29 19 20).

## 21 **Intervention**

22 Participants enrolled in the intervention arm have their plasma PIGF quantified in addition to  
23  
24 23 routine hospital investigations. The PIGF result is made immediately available to the  
25  
26 24 participants clinical team and documented clearly in the participant's medical notes. A  
27  
28 25 suggested further management algorithm is provided to the clinician based on both the  
29  
30 26 degree of hypertension present and the PIGF result. (Figure 4). This algorithm advocates  
31  
32 27 increased frequency of review for those participants identified as having an abnormal PIGF  
33  
34 28 result. The final decision regarding frequency of review remains with the treating clinician. If

1  
2  
3 1 4 weeks or more pass and the participant re-presents with symptoms suggestive of pre-  
4 2 eclampsia, a repeat PIGF quantification may be performed as long as the inclusion/exclusion  
5 3 criteria are still satisfied.  
6  
7  
8  
9 4

### 10 5 **PIGF Quantification**

11  
12 6 Maternal plasma PIGF quantification is performed on an ethylenediaminetetraacetic acid  
13 7 (EDTA) venous blood sample obtained in the standard fashion. Plasma is obtained through  
14 8 centrifugation and the sample is then processed immediately using a CE marked validated  
15 9 point of care platform; the automated Triage® Meterpro (ALERE San Diego, CA). Each  
16 10 hospital has the necessary equipment in situ and appropriately trained researchers in place,  
17 11 to perform this test as per manufacturer's guidelines. The PIGF measurement is reported as  
18 12 the absolute value in pg/ml within 30 minutes of sampling.  
19  
20  
21  
22  
23  
24  
25  
26  
27  
28  
29  
30  
31  
32  
33  
34  
35  
36  
37  
38  
39  
40  
41  
42  
43  
44  
45  
46  
47  
48  
49  
50  
51  
52  
53  
54  
55  
56  
57  
58  
59  
60

### 14 **Outcome Measure**

#### 15 ***Primary Outcome Measure***

16 To evaluate if the intervention is beneficial to both women and their babies and more  
17 importantly to ensure it is not harmful to either, the study has two equally important co-  
18 primary outcome measures. These are maternal morbidity and neonatal morbidity. For  
19 maternal morbidity assessment, the fullPIERS score is used with the addition of severe  
20 hypertension (Table 3). Severe systolic hypertension is an independent risk factor for stroke  
21 in pregnancy and in high resource settings uncontrolled hypertension is the main cause of  
22 death in women with pre-eclampsia. (21-23) For neonatal morbidity assessment, babies are  
23 dichotomised into having or not having objectively identified neonatal morbidity by means of  
24 a composite neonatal score (Table 4). The interval from diagnosis of pre-eclampsia to  
25 delivery is not a suitable outcome measure to use, as we are aware that knowledge of PIGF  
26 result may alter clinician management and expedite delivery (24).  
27  
28  
29  
30  
31  
32  
33  
34  
35  
36  
37  
38  
39  
40  
41  
42  
43  
44  
45  
46  
47  
48  
49  
50  
51  
52  
53  
54  
55  
56  
57  
58  
59  
60

#### 28 ***Secondary outcome measure***

1  
2  
3 1 Secondary outcomes include each component of the primary outcome reported individually  
4 as well as further maternal and neonatal assessments such as mode of delivery, antenatal  
5 2  
6 3 detection of growth restriction and use of antihypertensive agents (Table 5 & 6)

7  
8 4 A separate health economic evaluation is assessing the intervention's economic impact.  
9  
10 5 This is achieved through the use of participant quality of life (QoL) questionnaires (EQ-5D &  
11 6 SF-36), (25, 26) a specially designed study specific participant costing questionnaire and by  
12 7 assessment of costs to the health service of community based/ inpatient/day case care,  
13 8 through chart review at discharge (27-29).  
14  
15  
16  
17  
18  
19

### 20 **Data collection**

21  
22 11 Trial data captured locally at site by researchers are transmitted securely using an electronic  
23 12 clinical record form (eCRF) to a specific database developed by MedSciNet. Baseline  
24 13 demographic data, QoL questionnaires and the PIGF result are entered live to the eCRF at  
25 14 point of recruitment. The full eCRF is completed after discharge from the maternity hospital  
26 15 post-delivery, and includes neonatal and maternal medical outcome, costing questionnaire &  
27 16 repeat QoL questionnaires. All data entered to the eCRF is pseudo-anonymised with each  
28 17 participant identified by a unique study number. The identifier key is kept separately locally  
29 18 at site in a secure location. The data system is built to the same security and confidentiality  
30 19 standards as those of hospital electronic health records. The data at each participating  
31 20 centre are handled in accordance with local regulatory legislation and Ethics Committee  
32 21 approval. A detailed description of schedule and timing of data collection is provided (Figure  
33 22 5).  
34  
35  
36  
37  
38  
39  
40  
41  
42  
43  
44  
45  
46  
47

### 48 **Sample Size**

49  
50 25 The sample size was fixed by the number of sites and the study duration. It is anticipated  
51 26 that the total sample size will be in the region of 4000 participants; split across 7 clusters and  
52 27 the 8 time periods in the design (equivalent to a cluster-period size of about 71). With a  
53 28 sample size of 4000 and using a two-sided type I error rate of 0.025 (to allow for two co-  
54  
55  
56  
57  
58  
59  
60

1 primary outcomes), we determined the power to detect a 7% reduction in maternal morbidity  
2 (relative risk reduction of 20%) from 35% to 28% in the intervention i.e. 'active' group. This is  
3 assuming an ICC in the region of 0.01; but also consider Sensitivity to a range of ICC values  
4 between 0.005 and 0.05. The second co-primary outcome is adverse neonatal outcomes.  
5 Due to scarcity of information on the ICC, the same ICC as for the maternal outcome is  
6 assumed. Current rates of adverse events are around 10%. We determine power to detect  
7 an absolute change in neonatal adverse outcomes of 6%.

8  
9 To allow for the longitudinal nature of the trial, where correlations may differ between  
10 observations in the same cluster-period; and those measured in different cluster periods, we  
11 incorporate cluster-auto correlations (CAC). There is little information to support likely values  
12 for the CAC, so we are guided by values in the literature and explore sensitivity across a  
13 range of values (0.64, 0.80 and 0.96) (30, 31).

14  
15  
16 The power has been estimated using an online RShiny App. (32, 33) We have not included  
17 transition periods in the calculation but given the transition periods are just one week in  
18 length, this is not expected to significantly affect power. There has been no allowance for  
19 varying cluster sizes as this is currently not something which is technically possible in a  
20 stepped wedge study. Sample size calculations were performed assuming linear mixed  
21 models with categorical effects for time; random cluster and random cluster by period  
22 effects. (34) Under these assumptions, we constructed power curves, which reveal that  
23 under most anticipated scenarios the trial will have in the region of 80% power (Figures 6 &  
24 7). (31, 35)

## 25 26 **Data Analysis**

### 27 ***Clinical Outcome***



1  
2  
3 1 The primary aim of the study is to evaluate whether there is a difference in the two  
4  
5 2 composite outcomes before and after exposure to the intervention. Mixed effects regression  
6  
7 3 models will be used to allow for the clustering within sites. Calendar time will also be  
8  
9 4 adjusted for since the intervention is sequentially rolled-out both by including fixed  
10  
11 5 categorical time effects and random cluster by categorical time effects (36).

12  
13 6 The primary estimate of the treatment effects will therefore be cluster and time adjusted.  
14  
15 7 Time adjustment is essential, as it is a stepped wedge trial. Log Poisson regression models  
16  
17 8 with robust variance estimation (to allow for misspecification of binomial errors) will be used  
18  
19 9 so as to allow estimates of relative risks (37); to estimate risk differences corresponding  
20  
21 10 Binomial models with log links will be fitted. Secondary analysis will adjust for individual and  
22  
23 11 cluster level covariates. Both individual and cluster level covariates to be included in the  
24  
25 12 adjustment will be pre- specified. Null hypotheses and analyses for secondary outcomes  
26  
27 13 take a similar form to that for the primary outcome, and where outcomes are not binary,  
28  
29 14 analysis will be using the generalized linear mixed model. Transformations will be performed  
30  
31 15 where data are markedly not normally distributed. For the analysis adjusted for covariates  
32  
33 16 and for the secondary outcomes (unadjusted) multiple imputation methods will be used if the  
34  
35 17 proportion of missing data is more than about 5%, and this multiple imputation will also allow  
36  
37 18 for the clustered and temporal nature of the trial. It is not expected that there will be any  
38  
39 19 missing data in the primary outcome; as it will be assumed that if the outcome is present  
40  
41 20 then it will be recorded and if it is not recorded we will assume it is absent. This is a standard  
42  
43 21 and realistic assumption. Results will be presented as adjusted risk ratios with confidence  
44  
45 22 intervals (CI) and risk differences to allow full appreciation of clinical effect. To allow for the  
46  
47 23 two primary outcomes, we will follow good practice and adjust for this multiplicity using a  
48  
49 24 Bonferroni correction and so report 97.5% confidence intervals.

50  
51 25

52  
53 26 For secondary continuous outcomes mean differences will be reported and 99% confidence  
54  
55 27 intervals for secondary outcomes. We will report latent intra-cluster correlations for all  
56  
57 28 outcomes, along with 95% confidence intervals. Pre-specified subgroup analysis will be

1 undertaken on the primary outcome based on women presenting <35 weeks' gestation  
2 versus >35 weeks' gestation; size of unit and final confirmed diagnosis. The stepped wedge  
3 trial design will also allow investigation of treatment effect heterogeneity across clusters and  
4 time. These exploratory analyses will be reported using 99% confidence intervals. Analysis  
5 will be conducted by intention to treat and sites will be considered exposed to the  
6 intervention post randomised cross-over date.

### 8 ***Health Economic Outcome***

9 The economic evaluation will be informed by a decision analytical model, which will be  
10 designed and constructed for the study to reflect the maternal and fetal pathway and health  
11 states. Employing a decision analytical model allows for the extrapolation of existing data  
12 and the opportunity to systematically synthesise evidence from various sources. Primary  
13 data on maternal health outcomes will be available from the study with the distribution of  
14 EQ-5D-5L & SF-36 questionnaires which will inform the estimation of Quality Adjusted Life  
15 Years (QALYs). Fetal outcomes will be informed by secondary sources. A systematic  
16 literature review will be conducted, the results of which will be used to inform a meta-  
17 analysis so as to estimate fetal quality of life outcomes for the estimation of QALYs. Primary  
18 data on resource utilisation will be collected using the costing questionnaire. The costs and  
19 effects of the intervention and comparator will be compared to estimate an incremental cost  
20 effectiveness ratio in a Cost Utility Analysis. To address parameter and structural  
21 uncertainties, a probabilistic sensitivity analysis (PSA) will be performed.

## 23 **Discussion**

24 Based on previous experience during the PELICAN study, an analysis of success criteria  
25 and barriers to our proposed study was conducted. Potential barriers include the  
26 overestimation of (i) identification of eligible women by the research team, (ii) primary

1  
2  
3 1 outcome event rate (iii) and retention / attrition i.e. gaining outcomes data on all women  
4  
5 2 included.

6  
7  
8 3 A recruitment feasibility audit conducted in Cork University Maternity Hospital (CUMH) over  
9  
10 4 the course of a typical week in July 2016 identified 21 women who would be eligible for  
11  
12 5 inclusion in the PARROT Ireland study. This would equate to almost 1100 women per  
13  
14 6 annum in CUMH, approximately 13% of its annual delivery rate. This is in keeping with the  
15  
16 7 quoted 10% incidence of hypertensive disorders of pregnancy (HDP) in the population (38).  
17  
18 8 It is anticipated that over the 24 month duration of the study across the 7 hospitals  
19  
20 9 approximately 11,500 women will meet the study inclusion criteria (13% of the combined  
21  
22 10 annual delivery rate), and of these 4,000 will be recruited into this trial (33% of those  
23  
24 11 eligible). As inclusion in the trial will be optional and require informed consent from  
25  
26 12 participants, not all eligible women in each unit will be included. Projected inclusion rates will  
27  
28 13 be apparent via a dedicated MedSciNet database pre-programmed, available online and  
29  
30 14 contemporaneously updated, allowing prompt action to intervene when not optimal. A  
31  
32 15 conservative requirement of <50% of all eligible women to be recruited in order to reach  
33  
34 16 targets has deliberately been chosen and successful recruitment of the same population in  
35  
36 17 the PELICAN study is reassuring.

37  
38  
39 19 As participation in the trial does not require any extra attendances/input from the participant  
40  
41 20 for the remainder of the pregnancy, it is likely that retention of participants will not be an  
42  
43 21 issue. Similarly, the data outcome to assess for maternal and neonatal morbidity can be  
44  
45 22 readily obtained post-delivery following discharge of the participant from their stored medical  
46  
47 23 records locally at each unit. However, in order to fully examine the health economic  
48  
49 24 outcomes there exists a reliance on the return of completed questionnaires by the participant  
50  
51 25 post-delivery. To minimise attrition rates, the researcher at each site will endeavour to meet  
52  
53 26 with each participant post-delivery prior to their discharge and encourage them to complete  
54  
55 27 the health economic questionnaires.

1  
2  
3 1 The primary aim of the PARROT Ireland trial is to establish the effectiveness of revealed  
4 2 plasma PIGF measurement in reducing maternal morbidity (with assessment of neonatal  
5 3 safety in parallel) in women presenting with suspected pre-eclampsia prior to 37 weeks'  
6 4 gestation. Should the trial show a reduction in maternal morbidity without an increase in  
7 5 neonatal morbidity, or indeed a reduction in neonatal morbidity with no change in maternal  
8 6 morbidity, it would provide a strong argument for its incorporation into routine obstetric  
9 7 practice. The long-term aim of the trial is to demonstrate if PIGF measurement enables  
10 8 appropriate antenatal stratification of women presenting with suspected pre-eclampsia.  
11 9 Avoiding unnecessary hospital admission would be both clinically and economically  
12 10 beneficial. In contrast, those at increased risk of imminent adverse events, identified by an  
13 11 abnormal PIGF result, would have hospital resources re-directed to them. We anticipate that  
14 12 this trial will provide a definitive result on the benefits of PIGF testing which will act to  
15 13 influence international clinical practice.

14  
15  
16  
17  
18  
19  
20  
21  
22  
23  
24  
25  
26  
27  
28  
29  
30  
31  
32  
33  
34  
35  
36  
37  
38  
39  
40  
41  
42  
43  
44  
45  
46  
47  
48  
49  
50  
51  
52  
53  
54  
55  
56  
57  
58  
59  
60

## Abbreviations

|    |    |
|----|----|
| 1  |    |
| 2  |    |
| 3  | 1  |
| 4  |    |
| 5  | 2  |
| 6  | 3  |
| 7  | 4  |
| 8  | 5  |
| 9  | 6  |
| 10 | 7  |
| 11 | 8  |
| 12 | 9  |
| 13 | 10 |
| 14 | 11 |
| 15 | 12 |
| 16 | 13 |
| 17 | 14 |
| 18 | 15 |
| 19 | 16 |
| 20 | 17 |
| 21 | 18 |
| 22 | 19 |
| 23 | 20 |
| 24 | 21 |
| 25 | 22 |
| 26 | 23 |
| 27 | 24 |
| 28 | 25 |
| 29 | 26 |
| 30 | 27 |
| 31 | 28 |
| 32 | 29 |
| 33 | 30 |
| 34 | 31 |
| 35 | 32 |
| 36 | 33 |
| 37 |    |
| 38 |    |
| 39 |    |
| 40 | 34 |
| 41 |    |
| 42 |    |
| 43 |    |
| 44 |    |
| 45 |    |
| 46 |    |
| 47 |    |
| 48 |    |
| 49 |    |
| 50 |    |
| 51 |    |
| 52 |    |
| 53 |    |
| 54 |    |
| 55 |    |
| 56 |    |
| 57 |    |
| 58 |    |
| 59 |    |
| 60 |    |

## 1 **Declarations**

### 2 **Ethics approval and consent to participate**

3 The trial is being conducted in accordance with ethical principles that have their origin in the  
4 Declaration of Helsinki and are consistent with Good Clinical Practice and applicable  
5 regulatory requirements. The local ethics committee at each participating site has reviewed  
6 the trial protocol, including the patient information and informed consent form, and full ethical  
7 approval granted. Each eligible woman identified is required to give written informed consent  
8 prior to her inclusion in the trial. A GCP trained researcher at the local site obtains this  
9 consent.

10 Clinical Research Ethics Committee Cork: ECM 3 (h) 08/11/16

11 University College Hospital Galway EC: Ref 50/12

12 Coombe Womens & Infants University Hospital EC: Study No 20-2016

13 National Maternity Hospital EC: EC 20.2016

14 University Hospital Limerick EC: Ref: 68/16

15 Health Research Authority (Belfast): 16/WM/0484

16 Rotunda Hospital EC: REC-2016-020..

17

### 18 **Consent for publication**

19 Not Applicable

20

### 21 **Availability of data and material**

22 The dataset generated from this study is saved onto a secure electronic database and after  
23 close of the study will be archived in line with GCP regulations. The anonymised completed  
24 dataset will be available from the chief investigator of the trial upon reasonable request.

25

### 26 **Competing interests**

27 The authors declare that they have no competing interests.

## 1 **Funding**

2 The PARROT Ireland trial is funded by the Health Research Board Mother and Baby Clinical  
3 Trial Network Ireland (HRB CTN-2014-010) and by the INFANT research centre.  
4 Researchers from INFANT had a role in the design of the study and in writing the protocol.

## 6 **Authors' contributions**

7 All authors contributed to the overall study design and specific methodologies. LK conceived  
8 and designed the study with DD. LK and DHR produced the detailed protocol, with input  
9 from all authors. DHR drafted the manuscript with assistance from KH, KOD and LK. All  
10 authors have critically read, contributed with inputs and revisions and approved the final  
11 manuscript.

## 13 **Acknowledgements**

14 The authors would like to thank PARROT Ireland participants and the associated maternity  
15 units and staff for their support and involvement in this study.

## References

1. Sibai B, Dekker G, Kupferminc M. Pre-eclampsia. *Lancet*. 2005;365(9461):785-99.
2. Meyer NL, Mercer BM, Friedman SA, Sibai BM. Urinary dipstick protein: a poor predictor of absent or severe proteinuria. *American journal of obstetrics and gynecology*. 1994;170(1 Pt 1):137-41.
3. Waugh JJ, Bell SC, Kilby MD, Blackwell CN, Seed P, Shennan AH, et al. Optimal bedside urinalysis for the detection of proteinuria in hypertensive pregnancy: a study of diagnostic accuracy. *BJOG : an international journal of obstetrics and gynaecology*. 2005;112(4):412-7.
4. Kuo VS, Koumantakis G, Gallery ED. Proteinuria and its assessment in normal and hypertensive pregnancy. *American journal of obstetrics and gynecology*. 1992;167(3):723-8.
5. Villar J, Repke J, Markush L, Calvert W, Rhoads G. The measuring of blood pressure during pregnancy. *American journal of obstetrics and gynecology*. 1989;161(4):1019-24.
6. ACOG practice bulletin. Diagnosis and management of preeclampsia and eclampsia. Number 33, January 2002. *Obstetrics and gynecology*. 2002;99(1):159-67.
7. Meads CA, Cnossen JS, Meher S, Juarez-Garcia A, ter Riet G, Duley L, et al. Methods of prediction and prevention of pre-eclampsia: systematic reviews of accuracy and effectiveness literature with economic modelling. *Health Technology Assessment*. 2008;12(6):1-+.
8. Hayman R, Brockelsby J, Kenny L, Baker P. Preeclampsia: The endothelium, circulating factor(s) and vascular endothelial growth factor. *Journal of the Society for Gynecologic Investigation*. 1999;6(1):3-10.
9. Levine RJ, Maynard SE, Qian C, Lim KH, England LJ, Yu KF, et al. Circulating Angiogenic Factors and the Risk of Preeclampsia. *New England Journal of Medicine*. 2004;350(7):672-83.
10. Chappell LC, Duckworth S, Seed PT, Griffin M, Myers J, Mackillop L, et al. Diagnostic Accuracy of Placental Growth Factor in Women With Suspected Preeclampsia A Prospective Multicenter Study. *Circulation*. 2013;128(19):2121-31.
11. Zeisler H, Llorba E, Chantraine F, Vatish M, Staff AC, Sennström M, et al. Predictive Value of the sFlt-1:PIGF Ratio in Women with Suspected Preeclampsia. *New England Journal of Medicine*. 2016;374(1):13-22.
12. Zeisler H, Llorba E, Chantraine F, Vatish M, Staff AC, Sennstrom M, et al. Predictive Value of the sFlt-1:PIGF Ratio in Women with Suspected Preeclampsia. *New England Journal of Medicine*. 2016;374(1):13-22.
13. PIGF-based testing to help diagnose suspected pre-eclampsia (Triage PIGF test, Elecsys immunoassay sFlt-1/PIGF ratio, DELFIA Xpress PIGF 1-2-3 test, and BRAHMS sFlt-1 Kryptor/BRAHMS PIGF plus Kryptor PE ra [cited May 2016]. *Diagnostics guidance [DG23]* Published date: May 2016:[Available from: <https://www.nice.org.uk/guidance/dg23/chapter/1-Recommendations>].
14. Hemming K, Haines TP, Chilton PJ, Girling AJ, Lilford RJ. The stepped wedge cluster randomised trial: rationale, design, analysis, and reporting. *BMJ : British Medical Journal*. 2015;350.
15. Bland JM. Cluster randomised trials in the medical literature: two bibliometric surveys. *BMC medical research methodology*. 2004;4:21-.
16. Brown CA, Lilford RJ. The stepped wedge trial design: a systematic review. *BMC medical research methodology*. 2006;6:54-.
17. Stolberg HO, Norman G, Trop I. Randomized controlled trials. *American Journal of Roentgenology*. 2004;183(6):1539-44.
18. GCP. ICH HARMONISED TRIPARTITE GUIDELINE, GUIDELINE FOR GOOD CLINICAL PRACTICE E6(R1) 1996. Available from: [https://www.ich.org/fileadmin/Public\\_Web\\_Site/ICH\\_Products/Guidelines/Efficacy/E6/E6\\_R1\\_Guideline.pdf](https://www.ich.org/fileadmin/Public_Web_Site/ICH_Products/Guidelines/Efficacy/E6/E6_R1_Guideline.pdf).
19. HSE. THE MANAGEMENT OF HYPERTENSION IN PREGNANCY. 2016. p. 1-32.
20. NICE. Hypertension in Pregnancy 2010. Available from: <https://www.nice.org.uk/guidance/cg107>.



- 1  
2  
3 1 21. Cantwell R, Clutton-Brock T, Cooper G, Dawson A, Drife J, Garrod D, et al. Saving Mothers'  
4 2 Lives: Reviewing maternal deaths to make motherhood safer: 2006-2008. The Eighth Report of the  
5 3 Confidential Enquiries into Maternal Deaths in the United Kingdom. *BJOG : an international journal*  
6 4 of obstetrics and gynaecology. 2011;118 Suppl 1:1-203.  
7 5 22. Schutte JM, Schuitemaker NWE, Van Roosmalen J, Steegers EAP, Dutch Maternal Mortality  
8 6 C. Substandard care in maternal mortality due to hypertensive disease in pregnancy in the  
9 7 Netherlands. *BJOG: An International Journal of Obstetrics & Gynaecology*. 2008;115(6):732-6.  
10 8 23. Martin Jr JN, Thigpen BD, Moore RC, Rose CH, Cushman J, May W. Stroke and severe  
11 9 preeclampsia and eclampsia: A paradigm shift focusing on systolic blood pressure. *Obstetrics and*  
12 10 *gynecology*. 2005;105(2):246-54.  
13 11 24. Sharp A, Chappell L, Dekker G, Pelletier S, Garnier Y, Zeren O, et al. OP 2 Placental growth  
14 12 factor informed management of suspected pre-eclampsia and/or fetal growth restriction – The  
15 13 MAPPLE cohort study. *Pregnancy Hypertension: An International Journal of Women's Cardiovascular*  
16 14 *Health*. 2017;9(Supplement C):9-10.  
17 15 25. EQ-5D. Available from: [www.euroqol.org](http://www.euroqol.org)  
18 16 26. SF 6D. Available from: <https://www.sheffield.ac.uk/scharr/sections/heds/mvh/sf-6d>  
19  
20 17  
21 18 27. EuroQol--a new facility for the measurement of health-related quality of life. *Health policy*  
22 19 (Amsterdam, Netherlands). 1990;16(3):199-208.  
23 20 28. Ware JE, Jr., Sherbourne CD. The MOS 36-item short-form health survey (SF-36). I.  
24 21 Conceptual framework and item selection. *Medical care*. 1992;30(6):473-83.  
25 22 29. Brazier J, Usherwood T, Harper R, Thomas K. Deriving a preference-based single index from  
26 23 the UK SF-36 Health Survey. *Journal of clinical epidemiology*. 1998;51(11):1115-28.  
27 24 30. Martin J, Girling A, Nirantharakumar K, Ryan R, Marshall T, Hemming K. Intra-cluster and  
28 25 inter-period correlation coefficients for cross-sectional cluster randomised controlled trials for type-  
29 26 2 diabetes in UK primary care. *Trials*. 2016;17:402.  
30 27 31. Hooper R, Bourke L. Cluster randomised trials with repeated cross sections: alternatives to  
31 28 parallel group designs. *BMJ : British Medical Journal*. 2015;350.  
32 29 32. Hemming K. Available from: <https://clusterrcts.shinyapps.io/rshinyapp/>.  
33 30 33. Campbell MK, Fayers PM, Grimshaw JM. Determinants of the intracluster correlation  
34 31 coefficient in cluster randomized trials: the case of implementation research. *Clinical trials (London,*  
35 32 *England)*. 2005;2(2):99-107.  
36 33 34. Hemming K, Taljaard M. Sample size calculations for stepped wedge and cluster randomised  
37 34 trials: a unified approach. *Journal of clinical epidemiology*. 2016;69:137-46.  
38 35 35. Hemming K, Eldridge S, Forbes G, Weijer C, Taljaard M. How to design efficient cluster  
39 36 randomised trials. *Bmj*. 2017;358:j3064.  
40 37 36. Hemming K, Taljaard M, Forbes A. Analysis of cluster randomised stepped wedge trials with  
41 38 repeated cross-sectional samples. *Trials*. 2017;18:101.  
42 39 37. Zou GY. A modified Poisson regression approach to prospective studies with binary data.  
43 40 *American Journal of Epidemiology*. 2004;159(7):702-6.  
44 41 38. Duley L. The Global Impact of Pre-eclampsia and Eclampsia. *Seminars in Perinatology*.  
45 42 2009;33(3):130-7.

43

## Appendices;

**Table 1: Inclusion Criteria**

---

|                                                                                                          |
|----------------------------------------------------------------------------------------------------------|
| Pregnant women between 20+0 and 36+6 weeks of gestation (inclusive)                                      |
| with a;                                                                                                  |
| • Singleton pregnancy                                                                                    |
| • Aged 18 years or over                                                                                  |
| • Able to give informed consent                                                                          |
| • Presenting with suspected pre-eclampsia: (one or more of the following)                                |
| • Hypertension                                                                                           |
| • Dipstick proteinuria                                                                                   |
| • Headache                                                                                               |
| • Visual disturbances                                                                                    |
| • Epigastric or right upper quadrant pain                                                                |
| • Increasing oedema                                                                                      |
| • Suspected fetal growth restriction                                                                     |
| • If the healthcare provider deems that the woman requires further evaluation for possible pre-eclampsia |

**Table 2: Exclusion Criteria**

---

|                                                                                                                                                                                                                                                                                                                            |
|----------------------------------------------------------------------------------------------------------------------------------------------------------------------------------------------------------------------------------------------------------------------------------------------------------------------------|
| • Confirmed pre-eclampsia at point of enrolment;                                                                                                                                                                                                                                                                           |
| <i>“sustained hypertension with systolic BP <math>\geq</math> 140 or diastolic BP <math>\geq</math> 90 on at least two occasions at least 4hrs apart) with significant quantified proteinuria (&gt;300mg protein on 24hr collection or urine protein creatinine ratio &gt;30mg/mmol) or abnormal pre-eclampsia bloods”</i> |
| • $\geq$ 37 weeks gestation                                                                                                                                                                                                                                                                                                |
| • Multiple pregnancy                                                                                                                                                                                                                                                                                                       |
| • Abnormal pre-eclampsia bloods (new onset reduced number of platelets or deranged liver function/renal function tests, identified during routine care prior to enrolment and not attributable to anything other than pre-eclampsia).                                                                                      |
| • Decision regarding imminent delivery already made                                                                                                                                                                                                                                                                        |
| • Lethal fetal abnormality present                                                                                                                                                                                                                                                                                         |
| • Previous participation in PELICAN trial in a prior pregnancy                                                                                                                                                                                                                                                             |
| • Participation in a conflicting trial at the same time as PARROT Ireland                                                                                                                                                                                                                                                  |
| • Plan to use off protocol PIGF testing                                                                                                                                                                                                                                                                                    |

**Table 3: Components of the Maternal Morbidity Composite Score**

- 
- Confirmed placental abruption
  - Intensive Care Admission
  - CNS compromise;
    - Generalized tonic clonic seizure due to eclampsia, GCS <13, cerebral haemorrhage/ infarct, cortical blindness, retinal detachment, Transient ischaemic attack, reversible ischaemic neurological deficit*
  - Cardiorespiratory compromise;
    - myocardial ischaemia/ infarction, SpO2 <90%, >50% FiO2 for >1hr, intubation (other than for Caesarean section), pulmonary oedema, need for positive inotrope support*
  - Haematological compromise;
    - transfusion of any blood product, platelet count <100 x 109/l;*
  - Liver compromise;
    - hepatic dysfunction (ALT or AST >70 IU/L, haematoma, rupture;*
  - Kidney compromise;
    - acute renal insufficiency (creatinine >150 micromol/l); hemodialysis*
  - Severe hypertension
    - (systolic BP  $\geq$  160 mmHg on at least one occasion)*

**Table 4: Components of the Neonatal Morbidity Composite Score**

- 
- Perinatal death or death before hospital discharge
  - NICU admission for  $\geq$ 48 hrs.
  - Birthweight  $\leq$  5th customised centile
  - Apgar score <7 at 5 minutes
  - Umbilical artery acidosis at birth (cord pH <7.2)
  - Admission to neonatal unit
  - Respiratory distress syndrome
  - Interventricular haemorrhage
  - Retinopathy of prematurity
  - Confirmed infection
  - Necrotising enterocolitis
  - Fetal growth restriction identified on antenatal ultrasound
  - Gestation at delivery

**Table 5: Secondary Outcomes -Maternal**

- 
- Final diagnosis of hypertensive disorder of pregnancy (*Chronic HTN, Gestational HTN or pre-eclampsia*)
  - Gestation at diagnosis of pre-eclampsia
  - use of 1 or more antihypertensive drugs
  - Instrumental Delivery (*Ventouse or Forceps*)
  - Severe hypertension (systolic BP  $\geq$  160 mmHg on at least one occasion)
  - Maternal morbidity by fullPIERS model
    - *Confirmed placental abruption*
    - *Intensive care admission*
    - *Central Nervous System Compromise*
    - *Cardiorespiratory Compromise*
    - *Haematological Compromise*
    - *Liver Compromise*
    - *Kidney Compromise*
  - Progression to severe pre-eclampsia as defined by ACOG practice bulletin
    - *Systolic BP  $\geq$  160mmHG or diastolic BP  $\geq$  110mmHG on 2 occasions at least 4 hours apart while the patient is on bed rest (unless antihypertensive therapy is initiated before this time)*
    - *Thrombocytopenia (Platelet count  $<100 \times 10^9/L$ )*
    - *Impaired liver function as indicated by abnormally elevated blood concentrations of liver enzymes (to twice normal concentration), severe persistent right upper quadrant or epigastric pain unresponsive to medication and not accounted for by an alternative diagnoses, or both*
    - *Progressive renal insufficiency (serum creatinine concentration greater than 1.1mg/dL (150  $\mu$ mol/L) or a doubling of the serum creatinine concentration in the absence of other renal disease)*
    - *Pulmonary oedema*
    - *New onset cerebral or visual disturbances*
  - Elective delivery: induction of labour or Caesarean section
  - Caesarean section: emergency and elective

**Table 6: Secondary Outcomes -Neonatal**

- 
- Fetal growth restriction identified on antenatal ultrasound (*Estimated Fetal Weight and/or abdominal circumference  $<10^{\text{th}}$  customised centile, abnormality in umbilical artery doppler velocity or reduced level of amniotic fluid*)
  - Gestation at delivery
  - Perinatal death or death before hospital discharge
  - Admission to NICU
  - NICU admission for  $\geq 48$  hours
  - Birthweight  $\leq$  5th customised centile
  - Apgar score  $<7$  at 5 minutes
  - Umbilical artery acidosis at birth (*arterial cord pH  $<7.2$* )
  - Respiratory distress syndrome
  - Interventricular haemorrhage
  - Retinopathy of prematurity

- 1 • Confirmed infection (*confirmed on blood or CSF cultures*)
- 2 • Necrotising enterocolitis

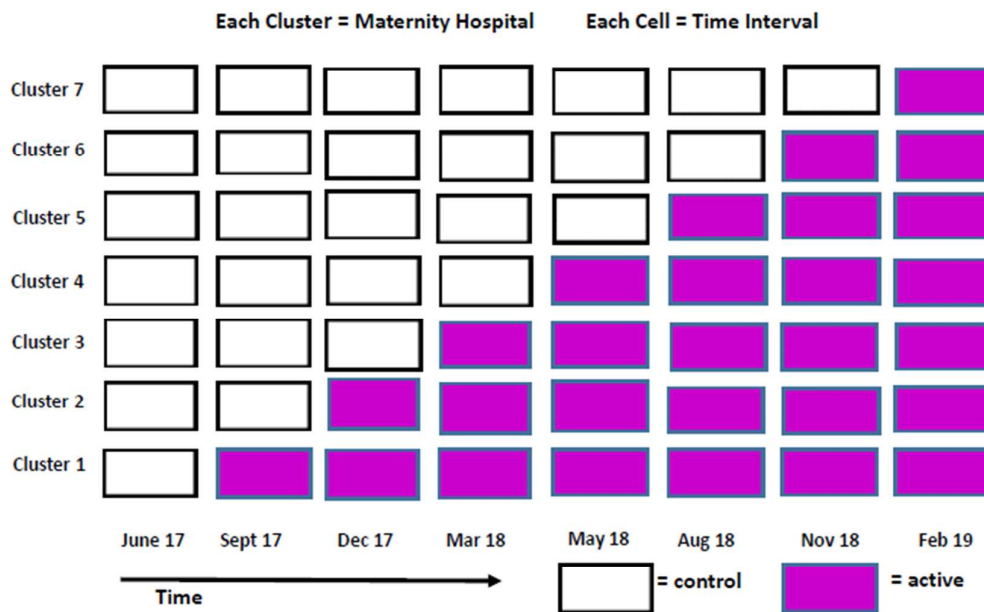

Figure 1; Stepped Wedge Cluster Randomised Design for PARROT Ireland

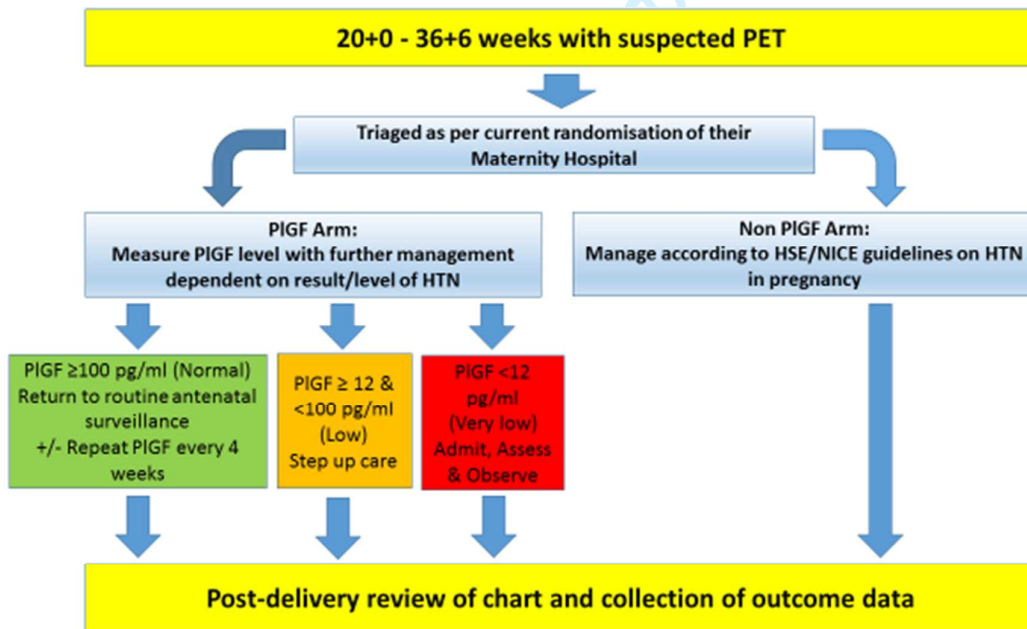

Figure 2; Trial Schematic for PARROT Ireland

**PARROT IRELAND** **Management Algorithm PARROT Ireland\_Republic**

**If patient enrolled in CONTROL arm – manage according to degree of hypertension present**

**Normotensive or mild hypertension: BP up to 149/99 mmHg**

Test for proteinuria weekly  
 PET bloods at presentation then as per routine clinical care  
 Do not treat BP  
 Fetal US if < 34 weeks

**Moderate hypertension: BP 150/100–159/109 mmHg**

Commence BP Treatment  
 Measure BP and urine at least twice a week  
 (If PCR > 30, do not repeat)  
 PET bloods at presentation then as per routine clinical care  
 Fetal US if < 34 weeks

**Severe hypertension: BP ≥ 160/110mmHg**

Admit to hospital until BP stabilises  
 Commence BP Treatment  
 Measure BP at least x 4/day while inpatient  
 Test for proteinuria  
 (if PCR < 30 check daily and once > 30 do not repeat)  
 PET bloods at presentation, repeat at least weekly.  
 Fetal US, AFI, Doppler & CTG

Management Algorithm Version 3.0 25<sup>th</sup> October 2017

**PARROT IRELAND** **Management Algorithm PARROT Ireland\_Belfast**

**If patient enrolled in CONTROL arm – manage according to degree of hypertension present**

**Normotensive or mild hypertension: BP up to 149/99 mmHg**

Do not admit/treat BP  
 Measure BP weekly  
 Test for proteinuria at each visit  
 Only those bloods for routine antenatal care

**Moderate hypertension: BP 150/100–159/109 mmHg**

Commence BP Treatment  
 Measure BP and urine at least twice a week  
 PET bloods at presentation do not repeat if no further proteinuria

**Severe hypertension: BP ≥ 160/110mmHg**

Admit to hospital until BP stabilises  
 Commence BP Treatment  
 Measure BP at least x 4/day while inpatient  
 Test for proteinuria daily  
 PET bloods at presentation, repeat weekly.

Management Algorithm Version 3.0 25<sup>th</sup> October 2017

**Figure 3; Management Algorithm for Control arm based on HSE/NICE guidelines for PARROT Ireland**

|                              |                                                                                                                                                                                                    | <b>Management Algorithm<br/>PARROT Ireland</b>                  |                                                                                                                                                                                                                            |                                                                 |                                                                                                                                                                                  |
|---------------------------------------------------------------------------------------------------------------|----------------------------------------------------------------------------------------------------------------------------------------------------------------------------------------------------|-----------------------------------------------------------------|----------------------------------------------------------------------------------------------------------------------------------------------------------------------------------------------------------------------------|-----------------------------------------------------------------|----------------------------------------------------------------------------------------------------------------------------------------------------------------------------------|
| <b>If patient enrolled in ACTIVE arm – integrate additional information from PIGF test as suggested below</b> |                                                                                                                                                                                                    |                                                                 |                                                                                                                                                                                                                            |                                                                 |                                                                                                                                                                                  |
| Normotensive or mild hypertension: BP up to 149/99 mmHg                                                       |                                                                                                                                                                                                    | Moderate hypertension: BP 150/100–159/109 mmHg                  |                                                                                                                                                                                                                            | Severe hypertension: BP ≥ 160/110mmHg                           |                                                                                                                                                                                  |
| <b>&lt;12 pg/ml<br/>(Highly abnormal)</b><br>Check PET Bloods                                                 | <b>Urgent further investigation</b><br>Fetal US for growth & doppler<br>If normal repeat doppler weekly<br>CTG from 26 weeks<br>Daily review                                                       | <b>&lt;12 pg/ml<br/>(Highly abnormal)</b><br>Check PET Bloods   | <b>Urgent further investigation</b><br>Fetal US for growth & doppler<br>If normal repeat doppler weekly<br>CTG from 26 weeks<br>Daily Review                                                                               | <b>&lt;12 pg/ml<br/>(Highly abnormal)</b><br>Check PET Bloods   | <b>Admit. Fetal US for growth &amp; doppler</b><br>CTG from 26 weeks –Daily CTG<br>If normal repeat doppler weekly<br>If BP stable and PCR <30 consider daily out patient review |
| <b>≥12 and &lt;100 pg/ml<br/>(Abnormal)</b><br>Check PET Bloods                                               | <b>Needs further investigation</b><br>Fetal growth & doppler within 72 hours<br>At least twice weekly review                                                                                       | <b>≥12 and &lt;100 pg/ml<br/>(Abnormal)</b><br>Check PET Bloods | <b>Home if no immediate clinical concern</b><br>Fetal US growth & Dopplers within 72 hours<br>At least twice weekly review                                                                                                 | <b>≥12 and &lt;100 pg/ml<br/>(Abnormal)</b><br>Check PET Bloods | <b>Fetal growth &amp; doppler within 72 hours</b><br>Consider out patient review once BP controlled—at least twice weekly.                                                       |
| <b>≥100 pg/ml<br/>(Normal)</b><br>Check PET Bloods                                                            | <b>Out patient care –weekly review</b><br>May have repeat PIGF testing at >4weeks<br>Repeat PET bloods only as per clinical care<br>If <32 weeks or very high risk for PET may review twice weekly | <b>≥100 pg/ml<br/>(Normal)</b><br>Check PET Bloods              | <b>Home if no immediate clinical concerns</b><br>Weekly review<br>May have repeat PIGF testing at >4weeks<br>Repeat PET Bloods only as per clinical care<br>If <32 weeks or very high risk for PET may review twice weekly | <b>≥100 pg/ml<br/>(Normal)</b><br>Check PET Bloods              | <b>Out patient review once BP controlled and no immediate concerns –twice weekly</b><br>Repeat PET bloods weekly<br>May have repeat PIGF testing at > 4weeks                     |
| Treating clinician has final decision on clinical management                                                  |                                                                                                                                                                                                    |                                                                 | Management Algorithm Version 3.0 25 <sup>th</sup> October 2017                                                                                                                                                             |                                                                 |                                                                                                                                                                                  |

**Figure 4; Suggested Management Algorithm for Intervention for PARROT Ireland**

1

|                                   | On presentation with suspected PET Between 20+0 and 36+6 weeks | From enrollment to discharge post delivery |                 | Discharge post delivery |                     |
|-----------------------------------|----------------------------------------------------------------|--------------------------------------------|-----------------|-------------------------|---------------------|
|                                   | In-person visit                                                | Chart                                      | In-person visit | Chart                   | In-person completed |
| Randomisation-Institutional level | X                                                              |                                            |                 |                         |                     |
| Inclusion/Exclusion               | X                                                              |                                            |                 |                         |                     |
| Informed Consent                  | X                                                              |                                            |                 |                         |                     |
| Demographics                      |                                                                | X <sup>a</sup>                             |                 |                         |                     |
| History, Comorbidities            |                                                                | X <sup>a</sup>                             |                 |                         |                     |
| Con Medications                   |                                                                | X <sup>a</sup>                             |                 | X                       |                     |
| Physical Measurements             |                                                                | X <sup>a</sup>                             |                 |                         |                     |
| Clinical readings                 |                                                                | X <sup>a</sup>                             |                 |                         |                     |
| PIGF <sup>b</sup> measurement     | X                                                              |                                            | X <sup>c</sup>  |                         |                     |
| Biobank sample <sup>d</sup>       | X                                                              |                                            |                 |                         |                     |
| Fetal assessments                 |                                                                |                                            |                 | X                       |                     |
| Prenatal admissions               |                                                                |                                            |                 | X                       |                     |
| Maternal PET bloods               |                                                                |                                            |                 | X                       |                     |
| Newborn data                      |                                                                |                                            |                 | X                       |                     |
| Neonatal outcome                  |                                                                |                                            |                 | X                       |                     |
| Maternal outcome                  |                                                                |                                            |                 | X                       |                     |
| Complications                     |                                                                |                                            |                 | X                       |                     |
| Postnatal admissions              |                                                                |                                            |                 | X                       |                     |
| Clinical Management               |                                                                |                                            |                 | X                       |                     |
| Final Outcomes                    |                                                                |                                            |                 | X                       |                     |
| EQ-5D, SF-36                      | X                                                              |                                            |                 |                         | X                   |
| Costing questionnaire             |                                                                |                                            |                 |                         | X                   |
| In person visits                  | X                                                              |                                            | X <sup>c</sup>  |                         |                     |

2 **Figure 5; SPIRIT Flow Diagram for Schedule of events in PARROT Ireland**

3 <sup>a</sup> May be captured in chart review or in consultation with participant at any time following enrolment.

4 <sup>b</sup> PIGF testing depends on Institutional randomisation allocation.

5 <sup>c</sup> PIGF testing will be repeated if readmission for suspected preeclampsia. May be repeated more  
6 than once. No more often than 4 weekly.

7 <sup>d</sup> Only at biobanking sites

8

9

10



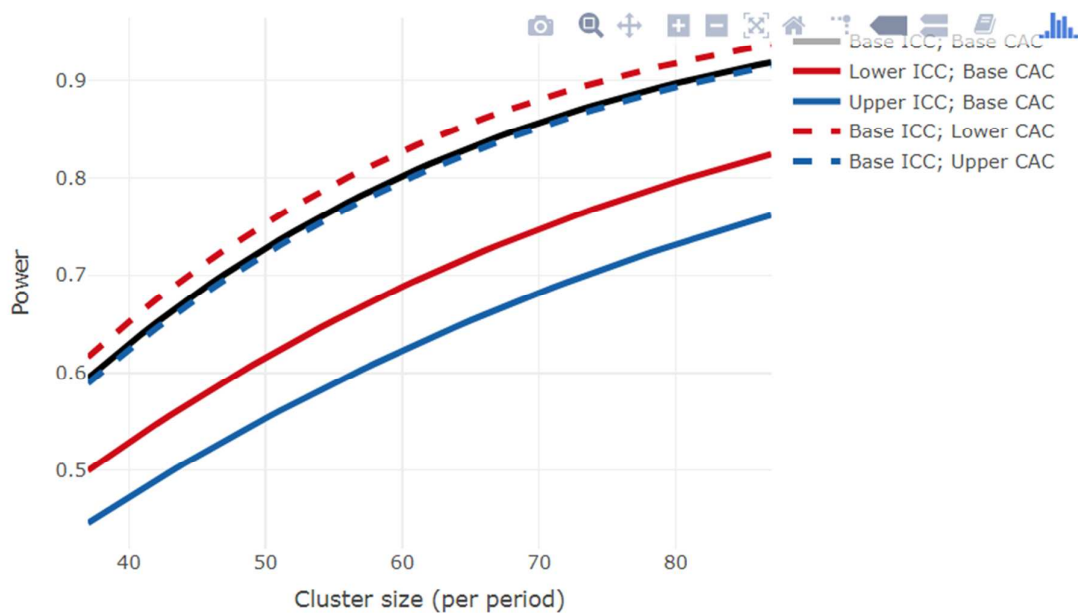

**Figure 6; Power Curve for PARROT Ireland for Maternal Adverse Outcomes**

Caption: Calculation assumes a stepped wedge design with 7 clusters randomised to 7 sequences (8 cluster-periods); a cross-sectional design; Base-case ICC is 0.001; lower ICC is 0.005; upper ICC is 0.01; base-case CAC is 0.8; lower CAC is 0.64; upper CAC is 0.96. Proportion under the control condition is 0.35 and under the intervention condition is 0.28; significance level is 0.025 (see text for justification) and test is two sided. Assumes large sample normal approximations.

1

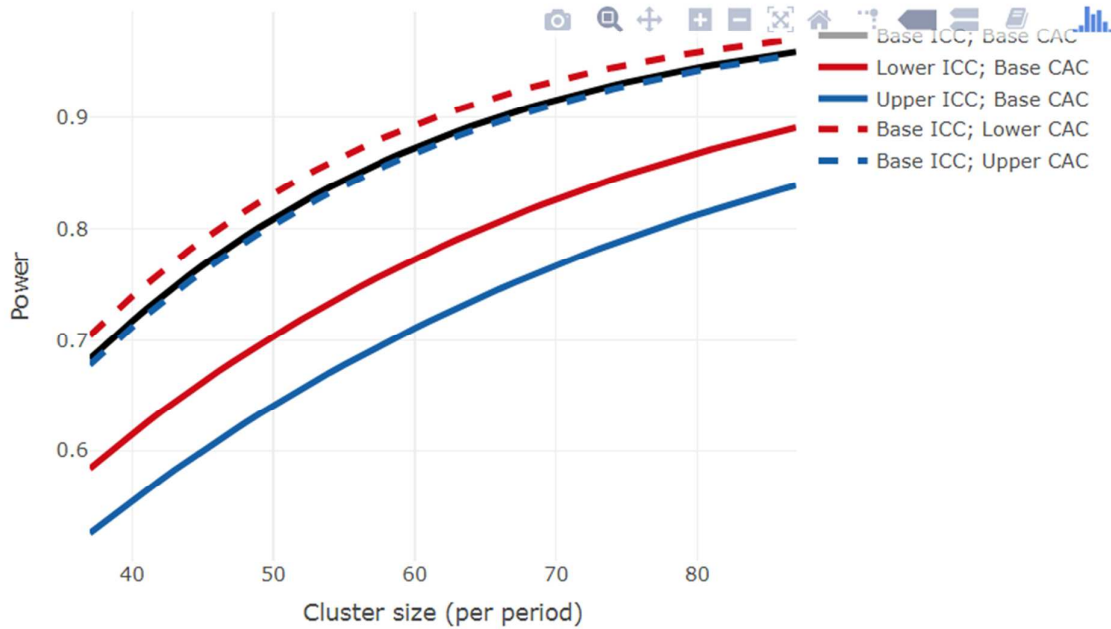

2

3 **Figure 7: Power Curve for PARROT Ireland for Neonatal Adverse Outcomes**

4

5 Caption: Calculation assumes a stepped wedge design with 7 clusters randomised to 7  
 6 sequences (8 cluster-periods); a cross-sectional design; Base-case ICC is 0.001; lower ICC  
 7 is 0.005; upper ICC is 0.01; base-case CAC is 0.8; lower CAC is 0.64; upper CAC is 0.96.  
 8 Proportion under the control condition is 0.1 and under the intervention condition is 0.155;  
 9 significance level is 0.025 (see text for justification) and test is two sided. Assumes large  
 10 sample normal approximations.

11

12

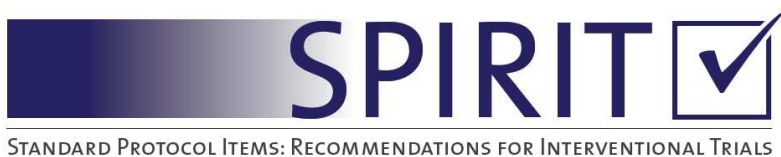

SPIRIT 2013 Checklist: Recommended items to address in a clinical trial protocol and related documents\*

| Section/item                      | Item No | Description                                                                                                                                                                                                                                                                              | Addressed on page number |
|-----------------------------------|---------|------------------------------------------------------------------------------------------------------------------------------------------------------------------------------------------------------------------------------------------------------------------------------------------|--------------------------|
| <b>Administrative information</b> |         |                                                                                                                                                                                                                                                                                          |                          |
| Title                             | 1       | Descriptive title identifying the study design, population, interventions, and, if applicable, trial acronym                                                                                                                                                                             | <u>1</u>                 |
| Trial registration                | 2a      | Trial identifier and registry name. If not yet registered, name of intended registry                                                                                                                                                                                                     | <u>2</u>                 |
|                                   | 2b      | All items from the World Health Organization Trial Registration Data Set                                                                                                                                                                                                                 | <u>9-11</u>              |
| Protocol version                  | 3       | Date and version identifier                                                                                                                                                                                                                                                              | <u>2</u>                 |
| Funding                           | 4       | Sources and types of financial, material, and other support                                                                                                                                                                                                                              | <u>4-5</u>               |
| Roles and responsibilities        | 5a      | Names, affiliations, and roles of protocol contributors                                                                                                                                                                                                                                  | <u>4</u>                 |
|                                   | 5b      | Name and contact information for the trial sponsor                                                                                                                                                                                                                                       | <u>4</u>                 |
|                                   | 5c      | Role of study sponsor and funders, if any, in study design; collection, management, analysis, and interpretation of data; writing of the report; and the decision to submit the report for publication, including whether they will have ultimate authority over any of these activities | <u>33</u>                |
|                                   | 5d      | Composition, roles, and responsibilities of the coordinating centre, steering committee, endpoint adjudication committee, data management team, and other individuals or groups overseeing the trial, if applicable (see Item 21a for data monitoring committee)                         | <u>34</u>                |

## Introduction

|                          |    |                                                                                                                                                                                                           |              |
|--------------------------|----|-----------------------------------------------------------------------------------------------------------------------------------------------------------------------------------------------------------|--------------|
| Background and rationale | 6a | Description of research question and justification for undertaking the trial, including summary of relevant studies (published and unpublished) examining benefits and harms for each intervention        | <u>14-16</u> |
|                          | 6b | Explanation for choice of comparators                                                                                                                                                                     | <u>14-16</u> |
| Objectives               | 7  | Specific objectives or hypotheses                                                                                                                                                                         | <u>16</u>    |
| Trial design             | 8  | Description of trial design including type of trial (eg, parallel group, crossover, factorial, single group), allocation ratio, and framework (eg, superiority, equivalence, noninferiority, exploratory) | <u>21-22</u> |

## Methods: Participants, interventions, and outcomes

|                      |     |                                                                                                                                                                                                                                                                                                                                                                                |                 |
|----------------------|-----|--------------------------------------------------------------------------------------------------------------------------------------------------------------------------------------------------------------------------------------------------------------------------------------------------------------------------------------------------------------------------------|-----------------|
| Study setting        | 9   | Description of study settings (eg, community clinic, academic hospital) and list of countries where data will be collected. Reference to where list of study sites can be obtained                                                                                                                                                                                             | <u>21</u>       |
| Eligibility criteria | 10  | Inclusion and exclusion criteria for participants. If applicable, eligibility criteria for study centres and individuals who will perform the interventions (eg, surgeons, psychotherapists)                                                                                                                                                                                   | <u>22-23</u>    |
| Interventions        | 11a | Interventions for each group with sufficient detail to allow replication, including how and when they will be administered                                                                                                                                                                                                                                                     | <u>23-24</u>    |
|                      | 11b | Criteria for discontinuing or modifying allocated interventions for a given trial participant (eg, drug dose change in response to harms, participant request, or improving/worsening disease)                                                                                                                                                                                 | <u>23-24</u>    |
|                      | 11c | Strategies to improve adherence to intervention protocols, and any procedures for monitoring adherence (eg, drug tablet return, laboratory tests)                                                                                                                                                                                                                              | <u>25</u>       |
|                      | 11d | Relevant concomitant care and interventions that are permitted or prohibited during the trial                                                                                                                                                                                                                                                                                  | <u>23-24</u>    |
| Outcomes             | 12  | Primary, secondary, and other outcomes, including the specific measurement variable (eg, systolic blood pressure), analysis metric (eg, change from baseline, final value, time to event), method of aggregation (eg, median, proportion), and time point for each outcome. Explanation of the clinical relevance of chosen efficacy and harm outcomes is strongly recommended | <u>17-20</u>    |
| Participant timeline | 13  | Time schedule of enrolment, interventions (including any run-ins and washouts), assessments, and visits for participants. A schematic diagram is highly recommended (see Figure)                                                                                                                                                                                               | <u>11/23-24</u> |

1  
2  
3  
4  
5  
6  
7  
8  
9  
10  
11  
12  
13  
14  
15  
16  
17  
18  
19  
20  
21  
22  
23  
24  
25  
26  
27  
28  
29  
30  
31  
32  
33  
34  
35  
36  
37  
38  
39  
40  
41  
42  
43  
44  
45  
46  
47

Sample size 14 Estimated number of participants needed to achieve study objectives and how it was determined, including clinical and statistical assumptions supporting any sample size calculations 30

Recruitment 15 Strategies for achieving adequate participant enrolment to reach target sample size 30

**Methods: Assignment of interventions (for controlled trials)**

Allocation:

Sequence generation 16a Method of generating the allocation sequence (eg, computer-generated random numbers), and list of any factors for stratification. To reduce predictability of a random sequence, details of any planned restriction (eg, blocking) should be provided in a separate document that is unavailable to those who enrol participants or assign interventions 25

Allocation concealment mechanism 16b Mechanism of implementing the allocation sequence (eg, central telephone; sequentially numbered, opaque, sealed envelopes), describing any steps to conceal the sequence until interventions are assigned 25

Implementation 16c Who will generate the allocation sequence, who will enrol participants, and who will assign participants to interventions 25

Blinding (masking) 17a Who will be blinded after assignment to interventions (eg, trial participants, care providers, outcome assessors, data analysts), and how 25

17b If blinded, circumstances under which unblinding is permissible, and procedure for revealing a participant's allocated intervention during the trial 25

**Methods: Data collection, management, and analysis**

Data collection methods 18a Plans for assessment and collection of outcome, baseline, and other trial data, including any related processes to promote data quality (eg, duplicate measurements, training of assessors) and a description of study instruments (eg, questionnaires, laboratory tests) along with their reliability and validity, if known. Reference to where data collection forms can be found, if not in the protocol 27-29

18b Plans to promote participant retention and complete follow-up, including list of any outcome data to be collected for participants who discontinue or deviate from intervention protocols 27-29

|    |                                 |     |                                                                                                                                                                                                                                                                                                                                       |              |
|----|---------------------------------|-----|---------------------------------------------------------------------------------------------------------------------------------------------------------------------------------------------------------------------------------------------------------------------------------------------------------------------------------------|--------------|
| 1  |                                 |     |                                                                                                                                                                                                                                                                                                                                       |              |
| 2  |                                 |     |                                                                                                                                                                                                                                                                                                                                       |              |
| 3  | Data management                 | 19  | Plans for data entry, coding, security, and storage, including any related processes to promote data quality (eg, double data entry; range checks for data values). Reference to where details of data management procedures can be found, if not in the protocol                                                                     | <u>27-29</u> |
| 4  |                                 |     |                                                                                                                                                                                                                                                                                                                                       |              |
| 5  |                                 |     |                                                                                                                                                                                                                                                                                                                                       |              |
| 6  |                                 |     |                                                                                                                                                                                                                                                                                                                                       |              |
| 7  | Statistical methods             | 20a | Statistical methods for analysing primary and secondary outcomes. Reference to where other details of the statistical analysis plan can be found, if not in the protocol                                                                                                                                                              | <u>31</u>    |
| 8  |                                 |     |                                                                                                                                                                                                                                                                                                                                       |              |
| 9  |                                 |     |                                                                                                                                                                                                                                                                                                                                       |              |
| 10 |                                 | 20b | Methods for any additional analyses (eg, subgroup and adjusted analyses)                                                                                                                                                                                                                                                              | <u>32</u>    |
| 11 |                                 |     |                                                                                                                                                                                                                                                                                                                                       |              |
| 12 |                                 | 20c | Definition of analysis population relating to protocol non-adherence (eg, as randomised analysis), and any statistical methods to handle missing data (eg, multiple imputation)                                                                                                                                                       | <u>31-32</u> |
| 13 |                                 |     |                                                                                                                                                                                                                                                                                                                                       |              |
| 14 |                                 |     |                                                                                                                                                                                                                                                                                                                                       |              |
| 15 | <b>Methods: Monitoring</b>      |     |                                                                                                                                                                                                                                                                                                                                       |              |
| 16 |                                 |     |                                                                                                                                                                                                                                                                                                                                       |              |
| 17 | Data monitoring                 | 21a | Composition of data monitoring committee (DMC); summary of its role and reporting structure; statement of whether it is independent from the sponsor and competing interests; and reference to where further details about its charter can be found, if not in the protocol. Alternatively, an explanation of why a DMC is not needed | <u>29</u>    |
| 18 |                                 |     |                                                                                                                                                                                                                                                                                                                                       |              |
| 19 |                                 |     |                                                                                                                                                                                                                                                                                                                                       |              |
| 20 |                                 |     |                                                                                                                                                                                                                                                                                                                                       |              |
| 21 |                                 |     |                                                                                                                                                                                                                                                                                                                                       |              |
| 22 |                                 | 21b | Description of any interim analyses and stopping guidelines, including who will have access to these interim results and make the final decision to terminate the trial                                                                                                                                                               | <u>33</u>    |
| 23 |                                 |     |                                                                                                                                                                                                                                                                                                                                       |              |
| 24 |                                 |     |                                                                                                                                                                                                                                                                                                                                       |              |
| 25 | Harms                           | 22  | Plans for collecting, assessing, reporting, and managing solicited and spontaneously reported adverse events and other unintended effects of trial interventions or trial conduct                                                                                                                                                     | <u>29</u>    |
| 26 |                                 |     |                                                                                                                                                                                                                                                                                                                                       |              |
| 27 |                                 |     |                                                                                                                                                                                                                                                                                                                                       |              |
| 28 | Auditing                        | 23  | Frequency and procedures for auditing trial conduct, if any, and whether the process will be independent from investigators and the sponsor                                                                                                                                                                                           | <u>32</u>    |
| 29 |                                 |     |                                                                                                                                                                                                                                                                                                                                       |              |
| 30 |                                 |     |                                                                                                                                                                                                                                                                                                                                       |              |
| 31 |                                 |     |                                                                                                                                                                                                                                                                                                                                       |              |
| 32 | <b>Ethics and dissemination</b> |     |                                                                                                                                                                                                                                                                                                                                       |              |
| 33 |                                 |     |                                                                                                                                                                                                                                                                                                                                       |              |
| 34 | Research ethics approval        | 24  | Plans for seeking research ethics committee/institutional review board (REC/IRB) approval                                                                                                                                                                                                                                             | <u>34</u>    |
| 35 |                                 |     |                                                                                                                                                                                                                                                                                                                                       |              |
| 36 |                                 |     |                                                                                                                                                                                                                                                                                                                                       |              |
| 37 | Protocol amendments             | 25  | Plans for communicating important protocol modifications (eg, changes to eligibility criteria, outcomes, analyses) to relevant parties (eg, investigators, REC/IRBs, trial participants, trial registries, journals, regulators)                                                                                                      | <u>36</u>    |
| 38 |                                 |     |                                                                                                                                                                                                                                                                                                                                       |              |
| 39 |                                 |     |                                                                                                                                                                                                                                                                                                                                       |              |
| 40 |                                 |     |                                                                                                                                                                                                                                                                                                                                       |              |
| 41 |                                 |     |                                                                                                                                                                                                                                                                                                                                       |              |
| 42 |                                 |     |                                                                                                                                                                                                                                                                                                                                       |              |
| 43 |                                 |     |                                                                                                                                                                                                                                                                                                                                       |              |
| 44 |                                 |     |                                                                                                                                                                                                                                                                                                                                       |              |
| 45 |                                 |     |                                                                                                                                                                                                                                                                                                                                       |              |
| 46 |                                 |     |                                                                                                                                                                                                                                                                                                                                       |              |
| 47 |                                 |     |                                                                                                                                                                                                                                                                                                                                       |              |

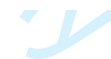

|    |                               |     |                                                                                                                                                                                                                                                                                     |              |
|----|-------------------------------|-----|-------------------------------------------------------------------------------------------------------------------------------------------------------------------------------------------------------------------------------------------------------------------------------------|--------------|
| 1  |                               |     |                                                                                                                                                                                                                                                                                     |              |
| 2  |                               |     |                                                                                                                                                                                                                                                                                     |              |
| 3  | Consent or assent             | 26a | Who will obtain informed consent or assent from potential trial participants or authorised surrogates, and how (see Item 32)                                                                                                                                                        | <u>25</u>    |
| 4  |                               |     |                                                                                                                                                                                                                                                                                     |              |
| 5  |                               |     |                                                                                                                                                                                                                                                                                     |              |
| 6  |                               | 26b | Additional consent provisions for collection and use of participant data and biological specimens in ancillary studies, if applicable                                                                                                                                               | <u>27</u>    |
| 7  |                               |     |                                                                                                                                                                                                                                                                                     |              |
| 8  | Confidentiality               | 27  | How personal information about potential and enrolled participants will be collected, shared, and maintained in order to protect confidentiality before, during, and after the trial                                                                                                | <u>27-29</u> |
| 9  |                               |     |                                                                                                                                                                                                                                                                                     |              |
| 10 |                               |     |                                                                                                                                                                                                                                                                                     |              |
| 11 | Declaration of interests      | 28  | Financial and other competing interests for principal investigators for the overall trial and each study site                                                                                                                                                                       | <u>35</u>    |
| 12 |                               |     |                                                                                                                                                                                                                                                                                     |              |
| 13 |                               |     |                                                                                                                                                                                                                                                                                     |              |
| 14 | Access to data                | 29  | Statement of who will have access to the final trial dataset, and disclosure of contractual agreements that limit such access for investigators                                                                                                                                     | <u>27-29</u> |
| 15 |                               |     |                                                                                                                                                                                                                                                                                     |              |
| 16 |                               |     |                                                                                                                                                                                                                                                                                     |              |
| 17 | Ancillary and post-trial care | 30  | Provisions, if any, for ancillary and post-trial care, and for compensation to those who suffer harm from trial participation                                                                                                                                                       | <u>35</u>    |
| 18 |                               |     |                                                                                                                                                                                                                                                                                     |              |
| 19 |                               |     |                                                                                                                                                                                                                                                                                     |              |
| 20 | Dissemination policy          | 31a | Plans for investigators and sponsor to communicate trial results to participants, healthcare professionals, the public, and other relevant groups (eg, via publication, reporting in results databases, or other data sharing arrangements), including any publication restrictions | <u>36</u>    |
| 21 |                               |     |                                                                                                                                                                                                                                                                                     |              |
| 22 |                               |     |                                                                                                                                                                                                                                                                                     |              |
| 23 |                               |     |                                                                                                                                                                                                                                                                                     |              |
| 24 |                               |     |                                                                                                                                                                                                                                                                                     |              |
| 25 |                               | 31b | Authorship eligibility guidelines and any intended use of professional writers                                                                                                                                                                                                      | <u>36</u>    |
| 26 |                               |     |                                                                                                                                                                                                                                                                                     |              |
| 27 |                               | 31c | Plans, if any, for granting public access to the full protocol, participant-level dataset, and statistical code                                                                                                                                                                     | <u>36</u>    |
| 28 |                               |     |                                                                                                                                                                                                                                                                                     |              |
| 29 | <b>Appendices</b>             |     |                                                                                                                                                                                                                                                                                     |              |
| 30 |                               |     |                                                                                                                                                                                                                                                                                     |              |
| 31 | Informed consent materials    | 32  | Model consent form and other related documentation given to participants and authorised surrogates                                                                                                                                                                                  | <u>41-46</u> |
| 32 |                               |     |                                                                                                                                                                                                                                                                                     |              |
| 33 |                               |     |                                                                                                                                                                                                                                                                                     |              |
| 34 | Biological specimens          | 33  | Plans for collection, laboratory evaluation, and storage of biological specimens for genetic or molecular analysis in the current trial and for future use in ancillary studies, if applicable                                                                                      | <u>27</u>    |
| 35 |                               |     |                                                                                                                                                                                                                                                                                     |              |
| 36 |                               |     |                                                                                                                                                                                                                                                                                     |              |

37 \*It is strongly recommended that this checklist be read in conjunction with the SPIRIT 2013 Explanation & Elaboration for important clarification on the items.  
 38 Amendments to the protocol should be tracked and dated. The SPIRIT checklist is copyrighted by the SPIRIT Group under the Creative Commons  
 39 "[Attribution-NonCommercial-NoDerivs 3.0 Unported](https://creativecommons.org/licenses/by-nc-nd/3.0/)" license.  
 40

# BMJ Open

## PARROT Ireland: (Placental growth factor in Assessment of women with suspected pre-eclampsia to Reduce maternal morbidity: a Stepped Wedge Cluster Randomised Control Trial) Research Study Protocol

|                                 |                                                                                                                                                                                                                                                                                                                                                                                                                                                                                                                                                                                                                                                                                                                                                                                                                                                                                                                                                                                                                                                                                                                                                                                                                                                                                                                                                                                                                                                                                                                                                                                                                                                                                                                                                                                                                                                                                                                                                                                                                             |
|---------------------------------|-----------------------------------------------------------------------------------------------------------------------------------------------------------------------------------------------------------------------------------------------------------------------------------------------------------------------------------------------------------------------------------------------------------------------------------------------------------------------------------------------------------------------------------------------------------------------------------------------------------------------------------------------------------------------------------------------------------------------------------------------------------------------------------------------------------------------------------------------------------------------------------------------------------------------------------------------------------------------------------------------------------------------------------------------------------------------------------------------------------------------------------------------------------------------------------------------------------------------------------------------------------------------------------------------------------------------------------------------------------------------------------------------------------------------------------------------------------------------------------------------------------------------------------------------------------------------------------------------------------------------------------------------------------------------------------------------------------------------------------------------------------------------------------------------------------------------------------------------------------------------------------------------------------------------------------------------------------------------------------------------------------------------------|
| Journal:                        | <i>BMJ Open</i>                                                                                                                                                                                                                                                                                                                                                                                                                                                                                                                                                                                                                                                                                                                                                                                                                                                                                                                                                                                                                                                                                                                                                                                                                                                                                                                                                                                                                                                                                                                                                                                                                                                                                                                                                                                                                                                                                                                                                                                                             |
| Manuscript ID                   | bmjopen-2018-023562.R1                                                                                                                                                                                                                                                                                                                                                                                                                                                                                                                                                                                                                                                                                                                                                                                                                                                                                                                                                                                                                                                                                                                                                                                                                                                                                                                                                                                                                                                                                                                                                                                                                                                                                                                                                                                                                                                                                                                                                                                                      |
| Article Type:                   | Protocol                                                                                                                                                                                                                                                                                                                                                                                                                                                                                                                                                                                                                                                                                                                                                                                                                                                                                                                                                                                                                                                                                                                                                                                                                                                                                                                                                                                                                                                                                                                                                                                                                                                                                                                                                                                                                                                                                                                                                                                                                    |
| Date Submitted by the Author:   | 02-Oct-2018                                                                                                                                                                                                                                                                                                                                                                                                                                                                                                                                                                                                                                                                                                                                                                                                                                                                                                                                                                                                                                                                                                                                                                                                                                                                                                                                                                                                                                                                                                                                                                                                                                                                                                                                                                                                                                                                                                                                                                                                                 |
| Complete List of Authors:       | <p>Hayes Ryan, Deirdre; The Irish Centre for Fetal and Neonatal Translational Research (INFANT), UCC, Cork; Dept. of Obstetrics and Gynaecology, University College Cork</p> <p>Hemming, Karla; University of Birmingham, Public Health</p> <p>Brethnach, FIONNUALA; Rotunda Hospital, Royal College of Surgeons in Ireland, Dublin</p> <p>Cotter, Amanda; Department of Obstetrics and Gynaecology, Graduate Entry Medical School, University of Limerick</p> <p>Devane, Declan; HRB Trials Methodology Research Network; National Univeristy of Ireland, Galway</p> <p>Hunter, Alyson; Royal Maternity Hospital, Grosvenor Road, BT12 6BB McAuliffe, Fionnuala; UCD Perinatal Research Centre, School of Medicine, University College Dublin, National Maternity Hospital, Dublin, Ireland</p> <p>Morrison, John; National University of Ireland Galway, Obstetrics and Gynaecology</p> <p>Murphy, Deirdre; Trinity College Dublin &amp; Coombe Women &amp; Infants University Hospital Dublin 8, Republic of Ireland</p> <p>Khashan, Ali; University College Cork, Department of Epidemiology and Public Health; The Irish Centre for Fetal and Neonatal Translational Research (INFANT), University College Cork, Ireland</p> <p>McElroy, Brendan; Economics Department, University College Cork, Cork, Ireland</p> <p>Murphy , A; University College Cork, Economics Department</p> <p>Dempsey, E; University College Cork, Department of Paediatrics and Child Health; The Irish Centre for Fetal and Neonatal Translational Research (INFANT), University College Cork, Ireland</p> <p>O'Donoghue, Keelin; Dept. of Obstetrics and Gynaecology, University College Cork; The Irish Centre for Fetal and Neonatal Translational Research (INFANT), University College Cork, Ireland</p> <p>Kenny, Louise; University of Liverpool School of Life Sciences, Department of Women's and Children's Health; The Irish Centre for Fetal and Neonatal Translational Research (INFANT), University College Cork, Ireland</p> |
| <b>Primary Subject Heading</b>: | Obstetrics and gynaecology                                                                                                                                                                                                                                                                                                                                                                                                                                                                                                                                                                                                                                                                                                                                                                                                                                                                                                                                                                                                                                                                                                                                                                                                                                                                                                                                                                                                                                                                                                                                                                                                                                                                                                                                                                                                                                                                                                                                                                                                  |
| Secondary Subject Heading:      | Obstetrics and gynaecology, Research methods, Health economics                                                                                                                                                                                                                                                                                                                                                                                                                                                                                                                                                                                                                                                                                                                                                                                                                                                                                                                                                                                                                                                                                                                                                                                                                                                                                                                                                                                                                                                                                                                                                                                                                                                                                                                                                                                                                                                                                                                                                              |



1  
2  
3  
4  
5  
6  
7  
8  
9  
10  
11  
12  
13  
14  
15  
16  
17  
18  
19  
20  
21  
22  
23  
24  
25  
26  
27  
28  
29  
30  
31  
32  
33  
34  
35  
36  
37  
38  
39  
40  
41  
42  
43  
44  
45  
46  
47  
48  
49  
50  
51  
52  
53  
54  
55  
56  
57  
58  
59  
60

|           |                                                                                                               |
|-----------|---------------------------------------------------------------------------------------------------------------|
| Keywords: | Pre-eclampsia, placental growth factor, stepped wedge cluster randomised trial, point of care diagnostic test |
|           |                                                                                                               |

SCHOLARONE™  
Manuscripts

1  
2  
3  
4 1 **PARROT Ireland: (P**lacental growth factor in **A**ssessment  
5 2 of women with suspected pre-eclampsia to **R**educe  
6 3 maternal morbidity: a Stepped Wedge Cluster **R**andomised  
7 4 **C**ontrol **T**rial) Research Study Protocol  
8  
9  
10  
11  
12  
13

14 8 **Trial registration**

15  
16  
17 9 Clinical Trials NCT02881073 (26<sup>th</sup> August 2016)

18  
19  
20 10 **Current Protocol:**

21  
22 11 Version 9.0 Dated: 13 November 2017

23  
24  
25 12  
26 13 •Corresponding author  
27 14 Deirdre Hayes-Ryan<sup>1,2\*</sup>  
28 15 Email: deirdre.hayesryan@ucc.ie

29 16  
30 17 Karla Hemming<sup>3</sup>  
31 18 Email: k.hemming@bham.ac.uk

32 19  
33 20 Fionnuala Breathnach<sup>4</sup>  
34 21 Email: fbreathnach@rcsi.ie

35 22  
36 23 Amanda Cotter<sup>5</sup>  
37 24 Email: amanda.cotter@ul.ie`

38 25  
39 26 Declan Devane<sup>1,6,7</sup>  
40 27 Email: declan.devane@nuigalway.ie

41 28  
42 29 Alyson Hunter<sup>8</sup>  
43 30 Email: alyson.hunter@belfasttrust.hscni.net

44 31  
45 32 Fionnuala M McAuliffe<sup>9</sup>  
46 33 Email: fionnuala.mcauliffe@ucd.ie

47 34  
48 35 Morrison John J.<sup>7,10</sup>  
49 36 Email: john.morrison@nuigalway.ie

50 37  
51 38 Deirdre J Murphy<sup>11</sup>  
52 39 Email: MURPHYD4@tcd.ie

53 40  
54 41 Ali Kashan<sup>1,12</sup>  
55 42 Email: a.khashan@ucc.ie  
56 43

1  
2  
3  
4  
5  
6  
7  
8  
9  
10  
11  
12  
13  
14  
15  
16  
17  
18  
19  
20  
21  
22  
23  
24  
25  
26  
27  
28  
29  
30  
31  
32  
33  
34  
35  
36  
37  
38  
39  
40  
41  
42  
43  
44  
45  
46  
47  
48  
49  
50  
51  
52  
53  
54  
55  
56  
57  
58  
59  
60

1 Brendan McElroy<sup>13</sup>  
2 Email: b.mcelroy@ucc.ie

3  
4 Aileen Murphy<sup>13</sup>  
5 Email: aileen.murphy@ucc.ie

6  
7 Eugene Dempsey<sup>1,2</sup>  
8 Email: G.Dempsey@ucc.ie

9  
10 Keelin O'Donoghue<sup>1,2</sup>  
11 Email: k.odonoghue@ucc.ie

12  
13 Louise C Kenny<sup>1,14</sup>  
14 Email: L.Kenny@ucc.ie

15  
16  
17 <sup>1</sup>The Irish Centre for Fetal and Neonatal Translational Research (INFANT),  
18 University College Cork, Ireland

19 <sup>2</sup>Cork University Maternity Hospital, Cork, Ireland

20 <sup>3</sup>University of Birmingham, United Kingdom

21 <sup>4</sup>Rotunda Hospital, Parnell Square W, Dublin 1, Ireland

22 <sup>5</sup>University Maternity Hospital Limerick

23 <sup>6</sup>HRB Trials Methodology Research Network

24 <sup>7</sup>National University of Ireland, Galway, Ireland

25 <sup>8</sup>Royal Jubilee Maternity Hospital, Belfast, Northern Ireland

26 <sup>9</sup>UCD Perinatal Research Centre, School of Medicine, University  
27 College Dublin, National Maternity Hospital, Dublin, Ireland

28 <sup>10</sup>Department of Obstetrics & Gynaecology, National University of  
29 Ireland Galway

30 <sup>11</sup>Trinity College Dublin & Coombe Women & Infants University  
31 Hospital Dublin 8, Republic of Ireland

32 <sup>12</sup>School of Public Health, University College Cork, Cork, Ireland

33 <sup>13</sup>Economics Department, University College Cork, Cork, Ireland

34 <sup>14</sup>Department of Women's and Children's Health, Liverpool Women's  
35 Hospital, University of Liverpool, UK

## 1 **Abstract**

### 2 **Introduction**

3 Women presenting with suspected pre-eclampsia are currently triaged on the basis of  
4 hypertension and dipstick proteinuria. This may result in significant false positive and negative  
5 diagnoses resulting in increased morbidity or unnecessary intervention. Recent data suggests  
6 that placental growth factor testing may be a useful adjunct in the management of women  
7 presenting with preterm pre-eclampsia. The primary objective of this trial is to determine if the  
8 addition of placental growth factor testing to the current clinical assessment of women with  
9 suspected preterm pre-eclampsia, is beneficial for both mothers and babies.

### 11 **Methods and Analysis**

12 This is a multicentre, stepped wedge cluster, randomised trial aiming to recruit 4000 women  
13 presenting with symptoms suggestive of preterm pre-eclampsia between 20 and 36+6 weeks'  
14 gestation. The intervention of an unblinded point of care test, performed at enrolment, will  
15 quantify maternal levels of circulating plasma placental growth factor. The intervention will be  
16 rolled out sequentially, based on randomisation, in the seven largest maternity units on the  
17 island of Ireland. Primary outcome is a composite outcome of maternal morbidity (derived from  
18 the modified fullPIERS model). To ensure we are not reducing maternal morbidity at the  
19 expense of earlier delivery and worse neonatal outcomes, we have established a co-primary  
20 outcome which will examine the effect of the intervention on neonatal morbidity, assessed  
21 using a composite neonatal score. Secondary analyses will examine further clinical outcomes  
22 (such as mode of delivery, antenatal detection of growth restriction and use of antihypertensive  
23 agents) as well as a health economic analysis, of incorporation of placental growth factor  
24 testing into routine care.

1  
2  
3 1  
4  
56 2 **Ethics and Dissemination**  
78  
9 3 Ethical approval has been granted from each of the seven maternity hospitals involved in the  
10 4 trial. The results of the trial will be presented both nationally and internationally at conference  
11 5 and published in an international peer-reviewed journal.  
12  
13  
14  
1516 6  
1718 7 **Strengths and limitations of this study**  
19

- 20
- 
- 21 8 - Randomised Trial
- 
- 22
- 
- 23 9 - Multiple sites with wide geographic distribution
- 
- 24
- 
- 25 10 - Stepped wedge design
- 
- 26
- 
- 27 11 - PIGF testing only in the Intervention arm
- 
- 28
- 
- 29

30 12  
3132 13 **Keywords**  
3334  
35 14 Pre-eclampsia, placental growth factor, PIGF, diagnostic test, point of care, stepped wedge  
36  
37 15 cluster randomised controlled trial  
38  
3940 16  
41  
4243 17  
44  
45  
46  
47  
48  
49  
50  
51  
52  
53  
54  
55  
56  
57  
58  
59  
60

## 1 Background

2 Pre-eclampsia is characterised by hypertension and proteinuria, complicates 2-8% of  
3 pregnancies, and is associated with significant maternal and neonatal morbidity and mortality  
4 (1). Currently women who present with suspected pre-eclampsia are triaged on the basis of  
5 hypertension and dipstick proteinuria. Both of these clinical endpoints are subject to observer  
6 error and poor test accuracy, with false positive and negative diagnoses of pre-eclampsia  
7 occurring in clinical practice (2-5). Current biochemical tests are imperfect at stratifying women  
8 for more intensive surveillance as they only identify advanced disease where there is already  
9 marked end-organ damage (6). While biomarkers and imaging techniques have been  
10 evaluated for improving detection, none have adequate sensitivity and/or specificity for the  
11 diagnosis of pre-eclampsia (7).

12  
13 Placental growth factor (PlGF) belongs to the vascular endothelial growth factor (VEGF) family  
14 and represents a key regulator of angiogenic events in pathological conditions (8). PlGF exerts  
15 its biological function through the binding and activation of the receptor Flt-1 (9, 10). In pre-  
16 eclampsia, it is thought that endothelial dysfunction leads to an increased level of a circulating  
17 decoy receptor, known as soluble Flt-1, (sFlt-1), a soluble receptor for both vascular  
18 endothelial growth factor type A (VEGF-A) and PlGF (11). Circulating levels of sFlt-1 are  
19 increased in pre-eclampsia and particularly in the early onset form of the disease, resulting in  
20 reduced levels of free VEGF-A and PlGF in the maternal circulation. Thus, the endothelial  
21 dysfunction observed in pre-eclampsia may be due to excess neutralisation of VEGF-A and  
22 PlGF by circulating sFlt-1. Levine et al. showed that in normal pregnancy, PlGF levels track  
23 the development of the placenta, peaking at about 32 weeks' gestation when the placenta is  
24 developed fully and then declining until delivery (12). However, in pre-eclampsia, this rise and  
25 fall is considerably lower throughout pregnancy, and levels are strikingly lower when the  
26 condition presents clinically.

1  
2  
3 1 The PELICAN study was the first and largest prospective evaluation of PIGF in women  
4  
5 2 presenting with suspected pre-eclampsia (13). This blinded observational cohort study was  
6  
7 3 conducted in seven consultant-led maternity units in the UK and Ireland between January  
8  
9 4 2011 and February 2012. It enrolled women being investigated for suspected pre-eclampsia,  
10  
11 5 quantified their plasma PIGF using a point of care device, the Alere Triage PIGF test ®, but  
12  
13 6 did not reveal the result to their clinician. The study found that a PIGF value <100 pg/ml, in  
14  
15 7 women presenting prior to 35 completed weeks' gestation had a negative predictive value of  
16  
17 8 98% (95% CI, 93 to 99.5) and a positive predictive value of 44% (95% CI, 36 to 52) in  
18  
19 9 determining those that would require delivery for a confirmed diagnosis of pre-eclampsia within  
20  
21 10 the next 14 days. The study reported a PIGF <100 pg/ml to be a better predictor than all other  
22  
23 11 current commonly used predictive tests of pre-eclampsia, either singly or in combination (blood  
24  
25 12 pressure, urinalysis or biochemical markers) with an area under the ROC curve for low PIGF  
26  
27 13 of 0.87 compared to 0.76 for the next best predictor.

28  
29  
30  
31  
32 14 The PROGNOSIS study was a prospective, multicentre, blinded, observational study  
33  
34 15 conducted in 14 countries from 2011 to 2014 (14). Its aim was to derive and validate a ratio of  
35  
36 16 serum sFlt-1 to PIGF that would be predictive of the absence or presence of pre-eclampsia in  
37  
38 17 the short term. It included women with singleton pregnancies from 24 weeks to 36+6 weeks'  
39  
40 18 gestation in whom a clinical suspicion of pre-eclampsia existed. The Elecsys immunoassay  
41  
42 19 was used to quantify levels of PIGF and sFlt-1. The development cohort of over 500  
43  
44 20 participants identified a sFlt-1:PIGF ratio of 38 as having an important predictive value. The  
45  
46 21 subsequent validation cohort, again with over 500 participants, reported a negative predictive  
47  
48 22 value of 99.3% (95% CI 97.9–99.9) for ruling out pre-eclampsia within one week. Interestingly,  
49  
50 23 the same cut off of 38 was predictive of the absence of fetal adverse outcomes within 1 week;  
51  
52 24 negative predictive value of 99.3% [95% CI, 97.9 to 99.9]. The study showed that an sFlt-1:  
53  
54 25 PIGF ratio of 38 or lower can be used to predict the short-term absence of pre-eclampsia and  
55  
56 26 adverse fetal events in women in whom the syndrome is suspected clinically (15). The positive  
57  
58 27 predictive value; a diagnosis of preeclampsia, eclampsia, or the HELLP syndrome within 4  
59  
60

1 weeks, was 36.7% (95% CI, 28.4 to 45.7) using the same sFlt-1: PIGF ratio of 38. Post hoc  
2 analysis however showed this was still an improvement in prediction compared to the use of  
3 clinical variables such as blood pressure and urinalysis alone.

4 NICE (The National Institute for Health and Clinical Excellence, UK) has recently published  
5 guidance on incorporation of PIGF testing, in addition to clinical assessment, in women  
6 presenting with suspected pre-eclampsia from 20-34<sup>+6</sup> weeks' gestation. It advises that the  
7 Triage PIGF test or Elecsys immunoassay sFlt-1/PIGF ratio test may be used, in combination  
8 with clinical assessment, to "rule-out" pre-eclampsia in this group of women. However, it  
9 advises that these tests should not yet be used to diagnose pre-eclampsia until further  
10 research is available, specifically on how an abnormal PIGF result would affect management  
11 decisions regarding timing and gestation of delivery and the outcomes associated with this  
12 (16).

13 The objective of this randomised trial is to evaluate the impact of knowledge of PIGF  
14 measurement on clinically relevant outcomes. We hypothesise that adding PIGF  
15 measurement to current clinical assessment of women with suspected pre-eclampsia prior to  
16 37 weeks' gestation will reduce associated maternal morbidity through improved risk  
17 stratification, earlier diagnosis and targeted management of women with the disease. Any  
18 intervention in late pregnancy may have an impact on the fetus. On the one hand, earlier  
19 diagnosis of pre-eclampsia may precipitate earlier delivery and lead to an increase in neonatal  
20 morbidity and mortality secondary to iatrogenic prematurity. Conversely, improved  
21 identification of those neonates at highest risk of imminent placental dysfunction may reduce  
22 neonatal morbidity by allowing for timely intervention. It is therefore imperative that full  
23 evaluation of both potential benefit and harm is conducted before PIGF testing is implemented  
24 routinely into clinical practice. If this trial demonstrates a beneficial impact on maternal  
25 morbidity and/or neonatal morbidity, alongside a favourable health economic assessment,  
26 then there would be a strong case for incorporating PIGF testing into routine clinical



1  
2  
3 1 investigations for women presenting with suspected pre-eclampsia before 37 weeks' gestation  
4  
5 2 in a wide variety of healthcare settings.  
6  
7  
8 3  
9

## 4 **Methods and Design**

### 5 **Study Design**

6 PARROT Ireland is a multi-centre, stepped wedge cluster-controlled trial of PIGF  
7 measurement in women presenting with suspected pre-eclampsia from 20 weeks and prior to  
8 37 weeks' gestation. As implementation of a diagnostic test may alter physician management,  
9 a cluster design was chosen rather than individual randomisation. This allows for a change in  
10 management to occur at a hospital rather than at an individual woman level, which is  
11 preferable in trials involving a diagnostic test and allows the clinical influence of the additional  
12 test to be evaluated in a pragmatic fashion (17). Each maternity hospital acts as a cluster. All  
13 clusters commenced the trial in the control arm and in turn, each cluster transitions at random  
14 from the control to the intervention at pre-specified time points. Once a cluster has changed  
15 over to the intervention, it continues as such for the remainder of the trial so that by the end  
16 of the trial all clusters will be in the intervention arm (Figure1). A stepped wedge design was  
17 chosen so as to increase the social acceptability of the trial to the 7 hospitals (the stake holders  
18 /decision makers in all of the hospitals expressed a desire to participate in a trial in which they  
19 were guaranteed to get the intervention); and because a trial with just 7 clusters risks baseline  
20 imbalance in a parallel design.

21 The trial will continue for a period of twenty-two months, and with seven clusters the interval  
22 between transitions is approximately three months in duration. A restricted method of  
23 randomisation was used to provide a balance in total (expected) number of observations  
24 across intervention and control periods (details below) (18-20). There is a short transition  
25 period of one week whenever a new cluster transitions from control to the intervention. Data  
26 collected during this transition period will not be included in any analysis of outcomes.

1 Recruitment will stop on a pre-specified fixed date in late April 2019 and the study will end  
 2 when the last recruited participant and neonate are discharged and all outcome data collected.

### 4 **Setting & Participants**

5 The trial is being conducted within the Health Research Board Mother and Baby Clinical Trial  
 6 Network Collaborative. The Coombe Women and Infants University Hospital Dublin, Cork  
 7 University Maternity Hospital, University Maternity Hospital Limerick, The Royal Jubilee  
 8 Maternity Hospital Belfast, University College Hospital Galway, The National Maternity  
 9 Hospital Dublin and The Rotunda Maternity Hospital Dublin are the seven largest consultant-  
 10 led maternity units on the island of Ireland. Combined, they have an annual birth rate of over  
 11 44,000, representing over half of the country's total annual births. Women attending these  
 12 maternity units who present with suspected pre-term pre-eclampsia are eligible for inclusion  
 13 in this trial. Detailed inclusion and exclusion criteria are described (Table 1 & 2).

15 **Table 1: Inclusion Criteria**

---

|                                                                                                                                                                                                                                                                                                                                                                                                                                                                                                                                                                                                                           |
|---------------------------------------------------------------------------------------------------------------------------------------------------------------------------------------------------------------------------------------------------------------------------------------------------------------------------------------------------------------------------------------------------------------------------------------------------------------------------------------------------------------------------------------------------------------------------------------------------------------------------|
| 17 Pregnant women between 20+0 and 36+6 weeks of gestation (inclusive)<br>18 with a;<br>19 • Singleton pregnancy<br>20 • Aged 18 years or over<br>21 • Able to give informed consent<br>22 • Presenting with suspected pre-eclampsia: (one or more of the<br>23 following)<br>24 • Hypertension<br>25 • Dipstick proteinuria<br>26 • Headache<br>27 • Visual disturbances<br>28 • Epigastric or right upper quadrant pain<br>29 • Increasing oedema<br>30 • Suspected fetal growth restriction<br>31 • If the healthcare provider deems that the woman requires further<br>32 evaluation for possible pre-eclampsia<br>33 |
|---------------------------------------------------------------------------------------------------------------------------------------------------------------------------------------------------------------------------------------------------------------------------------------------------------------------------------------------------------------------------------------------------------------------------------------------------------------------------------------------------------------------------------------------------------------------------------------------------------------------------|

35 **Table 2: Exclusion Criteria**

- 1 • Confirmed pre-eclampsia at point of enrolment;
- 2 *“sustained hypertension with systolic BP  $\geq$  140 or diastolic BP  $\geq$  90 on*
- 3 *at least two occasions at least 4hrs apart) with significant quantified*
- 4 *proteinuria (>300mg protein on 24hr collection or urine protein*
- 5 *creatinine ratio >30mg/mmol) or abnormal pre-eclampsia bloods”*
- 6 •  $\geq$ 37 weeks gestation
- 7 • Multiple pregnancy
- 8 • Abnormal pre-eclampsia bloods (new onset reduced number of
- 9 platelets or deranged liver function/renal function tests, identified
- 10 during routine care prior to enrolment and not attributable to
- 11 anything other than pre-eclampsia).
- 12 • Decision regarding imminent delivery already made
- 13 • Lethal fetal abnormality present
- 14 • Previous participation in PELICAN trial in a prior pregnancy
- 15 • Participation in a conflicting trial at the same time as PARROT Ireland
- 16 • Plan to use off protocol PIGF testing

## 20 Randomisation

21 The trial statisticians for the study developed a randomisation sequence for site transition from  
 22 control to intervention; however, the order of site transitioning is concealed from sites and  
 23 principal investigators until 12 weeks prior to the sites transition date. An allocation sequence  
 24 was randomly selected (i.e. a cross-over order for the 7 clusters) from a set of random  
 25 sequences constrained so that the sum of the total cluster sizes in the intervention status was  
 26 similar to the total sum of the cluster sizes in the control status. Similar was defined to be a  
 27 difference in the total sums exposed to intervention and control statuses being no different  
 28 than the expected middle 25th percentile range of differences. To implement this, 10,000  
 29 simulations of possible (unique) allocation sequences were performed. From this, the  
 30 difference in number exposed to intervention and control for each sequence was determined.  
 31 An allocation sequence was then selected at random from those falling within the middle 25th  
 32 percentile range of differences (17-19).

## 34 Control

35 Eligible women are approached and provided with detailed information about the trial, both  
 36 verbally and written, by a trained researcher. Eligibility is determined by review of symptoms

1 and signs at the time of presentation to the maternity hospital by the local researcher.  
2 Participants are not aware of their maternity hospitals current randomisation prior to their  
3 enrolment on the trial. Informed consent is obtained in accordance with ICH - GCP guidelines  
4 (21). Once an eligible woman has given written informed consent for inclusion in the study,  
5 her maternity hospitals current group allocation is revealed (Figure 2). Participants enrolled in  
6 the control arm receive usual hospital care as per National guidelines; these are Health  
7 Service Executive/Institute of Obstetrics and Gynaecology Irish guidelines for those in the  
8 Republic or the NICE guidelines for those in Northern Ireland (Figure 3a and 3b) (22, 23).  
9 Eligible women who are approached but who decline to participate in the trial will continue to  
10 receive usual hospital care.

## 12 **Intervention**

13 Participants enrolled in the intervention arm have their plasma PIGF quantified in addition to  
14 routine hospital investigations. The PIGF result is made immediately available to the  
15 participants clinical team and documented clearly in the participant's medical notes. A  
16 suggested further management algorithm is provided to the clinician based on both the degree  
17 of hypertension present and the PIGF result. (Figure 4). This algorithm advocates increased  
18 frequency of review for those participants identified as having an abnormal PIGF result. The  
19 final decision regarding frequency of review remains with the treating clinician. If 4 weeks or  
20 more pass and the participant re-presents with symptoms suggestive of pre-eclampsia, a  
21 repeat PIGF quantification may be performed as long as the inclusion/exclusion criteria are  
22 still satisfied. In certain sites the option of plasma Biobanking will be available. Participants  
23 will be consented separately for this. For those who give consent, a portion of the specimen  
24 taken will be used to measure the level of PIGF in the plasma and the remainder of the sample  
25 will be stored in University College Cork Biobanking facility.

## 27 **PIGF Quantification**

1  
2  
3 1 Maternal plasma PIGF quantification is performed on an ethylenediaminetetraacetic acid  
4  
5 2 (EDTA) venous blood sample obtained in the standard fashion. Plasma is obtained through  
6  
7 3 centrifugation and the sample is then processed immediately using a CE marked validated  
8  
9 4 point of care platform; the automated Triage® Meterpro (ALERE San Diego, CA). Each  
10  
11 5 hospital has the necessary equipment in situ and appropriately trained researchers in place,  
12  
13 6 to perform this test as per manufacturer's guidelines. The PIGF measurement is reported as  
14  
15 7 the absolute value in pg/ml within 30 minutes of commencing processing of the sample. All  
16  
17 8 samples taken will be analysed without delay by the researcher after venepuncture has  
18  
19 9 occurred and in accordance with manufacturers instructions. The Triage© PIGF test platform  
20  
21 10 and consumables necessary to perform testing are brought to the cluster just at the point of  
22  
23 11 transition to intervention. It is therefore not available at site for use while the site is in the  
24  
25 12 control arm.  
26  
27  
28  
29  
30

#### 31 **Patient and Public Involvement**

32 Patients/ public were not involved in the development of this trial.  
33  
34  
35  
36

#### 37 **Outcome Measure**

##### 38 ***Primary Outcome Measure***

39  
40  
41 19 To evaluate if the intervention is beneficial to both women and their babies and more  
42  
43 20 importantly to ensure it is not harmful to either, the study has two equally important co-primary  
44  
45 21 outcome measures. These are maternal morbidity and neonatal morbidity. For maternal  
46  
47 22 morbidity assessment, an adaption of the fullPIERS score is used (Table 3). The definition of  
48  
49 23 hepatic dysfunction is based on ALT rather than INR, requirement for ICU admission is  
50  
51 24 included as well as the presences of severe hypertension. Severe systolic hypertension is an  
52  
53 25 independent risk factor for stroke in pregnancy and in high resource settings uncontrolled  
54  
55 26 hypertension is the main cause of death in women with pre-eclampsia. (24-26) The interval  
56  
57 27 from diagnosis of pre-eclampsia to delivery is not a suitable outcome measure to use, as we  
58  
59 28 are aware that knowledge of PIGF result may alter clinician management and expedite

1 delivery (27). For neonatal morbidity assessment, babies are dichotomised into having or not  
 2 having identified neonatal morbidity by means of a composite neonatal score (Table 4). In  
 3 order to avoid subjectivity in the diagnosis of morbidity, the majority of components of the  
 4 neonatal composite score are objective measures; pH < 7.2, positive cultures, admission to  
 5 NICU. We acknowledge that some subjectivity can arise with staging of disease hence why  
 6 all stages of each disease will be captured and will comprise the composite outcome; NEC  
 7 Stage 1-3, IVH Grade 1-4 and ROP Stage 1-5. Neonatal outcomes and morbidity will be  
 8 captured from local case note review, as documented by the treating neonatologist. In cases  
 9 where any uncertainty is present, the researcher will discuss the case with the local PI and or  
 10 the trial clinical fellow and a consensus will be reached

11  
 12 **Table 3: Components of the Maternal Morbidity Composite Score**

- 
- 14 • Confirmed placental abruption
  - 15 • Intensive Care Admission
  - 16 • CNS compromise;  
 17 *Generalized tonic clonic seizure due to eclampsia, GCS*  
 18 *<13, cerebral haemorrhage/ infarct, cortical blindness,*  
 19 *retinal detachment, Transient ischaemic attack, reversible*  
 20 *ischaemic neurological deficit*
  - 21 • Cardiorespiratory compromise;  
 22 *myocardial ischaemia/ infarction, SpO2 <90%, >50% FiO2 for >1hr,*  
 23 *intubation (other than for Caesarean section), pulmonary oedema, need*  
 24 *for positive inotrope support*
  - 25 • Haematological compromise;  
 26 *transfusion of any blood product, platelet count <100 x 109/l;*
  - 27 • Liver compromise;  
 28 *hepatic dysfunction (ALT or AST >70 IU/L, haematoma, rupture;*
  - 29 • Kidney compromise;  
 30 *acute renal insufficiency (creatinine >150 micromol/l); hemodialysis*
  - 31 • Severe hypertension  
 32 *(systolic BP ≥ 160 mmHg on at least one occasion)*

33  
 34  
 35  
 36 **Table 4: Components of the Neonatal Morbidity Composite Score**

- 
- 38 • Perinatal death or death before hospital discharge
  - 39 • NICU admission for ≥48 hrs.
  - 40 • Birthweight ≤ 5th customised centile\*
  - 41 • Apgar score <7 at 5 minutes
  - 42 • Umbilical artery acidosis at birth (cord pH <7.2)

- 1 • Admission to neonatal unit
- 2 • Respiratory distress syndrome
- 3 • Interventricular haemorrhage
- 4 • Retinopathy of prematurity
- 5 • Confirmed infection (*confirmed on blood or CSF cultures*)
- 6 • Necrotising enterocolitis

7 \*Customised birth weight at delivery is calculated using the GROW centile

### 9 **Secondary outcome measure**

10 Secondary outcomes include each component of the primary outcome reported individually  
 11 as well as further maternal and neonatal assessments such as mode of delivery and use of  
 12 antihypertensive agents (Table 5 & 6). Fetal growth restriction, identified on antenatal  
 13 ultrasound, has been included as a secondary outcome measure of neonatal morbidity. As  
 14 PIGF correlates well with placental dysfunction it may be able to differentiate between those  
 15 babies with pathological growth restriction rather than constitutional growth restriction and  
 16 hence improve neonatal outcomes.

18 **Table 5: Secondary Outcomes -Maternal**

- 
- 19 • Final diagnosis of hypertensive disorder of pregnancy (*Chronic*  
 20 *HTN, Gestational HTN or pre-eclampsia*)
  - 21 • Gestation at diagnosis of pre-eclampsia
  - 22 • use of 1 or more antihypertensive drugs
  - 23 • Instrumental Delivery (*Ventouse or Forceps*)
  - 24 • Severe hypertension (systolic BP  $\geq$  160 mmHg on at least one occasion)
  - 25 • Maternal morbidity by fullPIERS model
    - 26 • *Confirmed placental abruption*
    - 27 • *Intensive care admission*
    - 28 • *Central Nervous System Compromise*
    - 29 • *Cardiorespiratory Compromise*
    - 30 • *Haematological Compromise*
    - 31 • *Liver Compromise*
    - 32 • *Kidney Compromise*
  - 33 • Progression to severe pre-eclampsia as defined by ACOG practice bulletin
    - 34 • *Systolic BP  $\geq$  160mmHG or diastolic BP  $\geq$  110mmHG on 2*  
 35 *occasions at least 4 hours apart while the patient is on bed rest*  
 36 *(unless antihypertensive therapy is initiated before this time)*
    - 37 • *Thrombocytopenia (Platelet count  $<$ 100 x 10<sup>9</sup>/L)*
    - 38 • *Impaired liver function as indicated by abnormally elevated blood*  
 39 *concentrations of liver enzymes (to twice normal concentration),*  
 40 *severe persistent right upper quadrant or epigastric pain*  
 41 *unresponsive to medication and not accounted for by an*  
 42 *alternative diagnoses, or both*

- *Progressive renal insufficiency (serum creatinine concentration greater than 1.1mg/dL (150 µmol/L) or a doubling of the serum creatinine concentration in the absence of other renal disease)*
- *Pulmonary oedema*
- *New onset cerebral or visual disturbances*
- Elective delivery: induction of labour or Caesarean section
- Caesarean section: emergency and elective

**Table 6: Secondary Outcomes -Neonatal**

- 
- Fetal growth restriction identified on antenatal ultrasound\*  
(*Estimated Fetal Weight and/or abdominal circumference <10<sup>th</sup> customised centile, abnormality in umbilical artery doppler velocity or reduced level of amniotic fluid*)
  - Gestation at delivery
  - Perinatal death or death before hospital discharge
  - Admission to NICU
  - NICU admission for ≥48 hours
  - Birthweight ≤ 5th customised centile
  - Apgar score <7 at 5 minutes
  - Umbilical artery acidosis at birth (*arterial cord pH <7.2*)
  - Respiratory distress syndrome
  - Interventricular haemorrhage
  - Retinopathy of prematurity
  - Confirmed infection (*confirmed on blood or CSF cultures*)
  - Necrotising enterocolitis

\**Antenatal detection of Fetal Growth restriction is based on formal ultrasound assessment of fetal biometry using the Hadlock formula.*

A separate health economic evaluation is assessing the intervention's economic impact. This is achieved through the use of participant quality of life (QoL) questionnaires (EQ-5D & SF-36), (28, 29) a specially designed study specific participant costing questionnaire and by assessment of costs to the health service of community based/ inpatient/day case care, through chart review at discharge (30-32).

### **Data collection**

Trial data captured locally at site by researchers are transmitted securely using an electronic clinical record form (eCRF) to a specific database developed by MedSciNet. Baseline demographic data, QoL questionnaires and the PIGF result are entered live to the eCRF at point of recruitment. The full eCRF is completed after discharge from the maternity hospital



1 post-delivery, and includes neonatal and maternal medical outcome, costing questionnaire &  
 2 repeat QoL questionnaires. All data entered to the eCRF is pseudo-anonymised with each  
 3 participant identified by a unique study number. The identifier key is kept separately locally at  
 4 site in a secure location. The data system is built to the same security and confidentiality  
 5 standards as those of hospital electronic health records. The data at each participating centre  
 6 are handled in accordance with local regulatory legislation and Ethics Committee approval. A  
 7 detailed description of schedule and timing of data collection is provided (Table 7).

|                                   | On presentation with suspected PET Between 20+0 and 36+6 weeks | From enrollment to discharge post delivery |                 | Discharge post delivery |                     |
|-----------------------------------|----------------------------------------------------------------|--------------------------------------------|-----------------|-------------------------|---------------------|
|                                   | In-person visit                                                | Chart                                      | In-person visit | Chart                   | In-person completed |
| Randomisation-Institutional level | X                                                              |                                            |                 |                         |                     |
| Inclusion/Exclusion               | X                                                              |                                            |                 |                         |                     |
| Informed Consent                  | X                                                              |                                            |                 |                         |                     |
| Demographics                      |                                                                | X <sup>a</sup>                             |                 |                         |                     |
| History, Comorbidities            |                                                                | X <sup>a</sup>                             |                 |                         |                     |
| Con Medications                   |                                                                | X <sup>a</sup>                             |                 | X                       |                     |
| Physical Measurements             |                                                                | X <sup>a</sup>                             |                 |                         |                     |
| Clinical readings                 |                                                                | X <sup>a</sup>                             |                 |                         |                     |
| PIGF <sup>b</sup> measurement     | X                                                              |                                            | X <sup>c</sup>  |                         |                     |
| Biobank sample <sup>d</sup>       | X                                                              |                                            |                 |                         |                     |
| Fetal assessments                 |                                                                |                                            |                 | X                       |                     |
| Prenatal admissions               |                                                                |                                            |                 | X                       |                     |
| Maternal PET bloods               |                                                                |                                            |                 | X                       |                     |
| Newborn data                      |                                                                |                                            |                 | X                       |                     |
| Neonatal outcome                  |                                                                |                                            |                 | X                       |                     |
| Maternal outcome                  |                                                                |                                            |                 | X                       |                     |
| Complications                     |                                                                |                                            |                 | X                       |                     |
| Postnatal admissions              |                                                                |                                            |                 | X                       |                     |
| Clinical Management               |                                                                |                                            |                 | X                       |                     |
| Final Outcomes                    |                                                                |                                            |                 | X                       |                     |
| EQ-5D, SF-36                      | X                                                              |                                            |                 |                         | X                   |
| Costing questionnaire             |                                                                |                                            |                 |                         | X                   |
| In person visits                  | X                                                              |                                            | X <sup>c</sup>  |                         |                     |

9 **Table 7; SPIRIT Flow Diagram for Schedule of events in PARROT Ireland**

10 <sup>a</sup> May be captured in chart review or in consultation with participant at any time following enrolment.

1  
2  
3 1 <sup>b</sup> PIGF testing depends on Institutional randomisation allocation. <sup>c</sup> PIGF testing will be  
4 2 repeated if readmission for suspected preeclampsia. May be repeated more than once. No  
5 3 more often than 4 weekly. <sup>d</sup> Only at biobanking sites  
6  
7  
8  
9 4

## 11 5 **Sample Size**

12  
13 6 The sample size was fixed by the number of sites and the study duration. It is anticipated that  
14 7 the total sample size will be in the region of 4000 participants; split across 7 clusters and the  
15 8 8 time periods in the design (equivalent to a cluster-period size of about 71). With a sample  
16 9 size of 4000 and using a two-sided type I error rate of 0.025 (to allow for two co-primary  
17 10 outcomes), we determined the power to detect a 7% reduction in maternal morbidity (relative  
18 11 risk reduction of 20%) from 35% to 28% in the intervention i.e. 'active' group (based on a  
19 12 reported rate of adverse maternal outcome in the region of 35% in the PELICAN trial).(13)  
20 13 (33)This is assuming an ICC in the region of 0.01; but also consider Sensitivity to a range of  
21 14 ICC values between 0.005 and 0.05. The second co-primary outcome is adverse neonatal  
22 15 outcomes. Due to scarcity of information on the ICC, the same ICC as for the maternal  
23 16 outcome is assumed. Current rates of adverse events are around 10%. We determine power  
24 17 to detect an absolute change in neonatal adverse outcomes of 6%.  
25  
26  
27  
28  
29  
30  
31  
32  
33  
34  
35  
36  
37  
38  
39  
40  
41  
42  
43  
44  
45  
46  
47  
48  
49  
50  
51  
52

19 To allow for the longitudinal nature of the trial, where correlations may differ between  
20 observations in the same cluster-period; and those measured in different cluster periods, we  
21 incorporate cluster-auto correlations (CAC). There is little information to support likely values  
22 for the CAC, so we are guided by values in the literature and explore sensitivity across a range  
23 of values (0.64, 0.80 and 0.96). (34, 35)  
24

25 The power has been estimated using an online RShiny App. (36, 37) We have not included  
26 transition periods in the calculation but given the transition periods are just one week in length,  
27 this is not expected to significantly affect power. There has been no allowance for varying  
28 cluster sizes as this is currently not something which is technically possible in a stepped wedge

1 study. Sample size calculations were performed assuming linear mixed models with  
2 categorical effects for time; random cluster and random cluster by period effects. (38) Under  
3 these assumptions, we constructed power curves, which reveal that under most anticipated  
4 scenarios the trial will have in the region of 80% power (Figures 5 & 6). (35, 39)

## 6 **Data Analysis**

### 7 ***Clinical Outcome***

8 The primary aim of the study is to evaluate whether there is a difference in the two composite  
9 outcomes before and after exposure to the intervention. There will be no double counting of  
10 outcomes, individuals not events will be presented for the composite . Mixed effects regression  
11 models will be used to allow for the clustering within sites. Calendar time will also be adjusted  
12 for since the intervention is sequentially rolled-out both by including fixed categorical time  
13 effects and random cluster by categorical time effects (40).

14 The primary estimate of the treatment effects will therefore be cluster and time adjusted. Time  
15 adjustment is essential, as it is a stepped wedge trial. Log Poisson regression models with  
16 robust variance estimation (to allow for misspecification of binomial errors) will be used so as  
17 to allow estimates of relative risks (41); to estimate risk differences corresponding Binomial  
18 models with log links will be fitted. Secondary analysis will adjust for individual and cluster  
19 level covariates. In the first instance, comparative estimates of differences between groups  
20 will be adjusted for variables used in the randomisation procedure (eg; site, time and hospital  
21 size). Further, more fully adjusted analyses, will also be performed. These more fully adjusted  
22 analyses will adjust for gestational age at recruitment, maternal age, smoking status, maternal  
23 BMI, public versus private obstetric care and maternal co-morbidities such as Chronic Renal  
24 Disease, SLE/APS & Diabetes. It will also adjust for hospital size (< or >5000  
25 deliveries/annum). Categorical continuous variables (e.g. age) will be treated as continuous  
26 variables in this adjustment. If covariate adjustment is not practical, unadjusted estimates will  
27 be produced and it will be made clear in the output why this occurred (e.g. not possible due to  
28 low event rate lack of model convergence). Null hypotheses and analyses for secondary

1 outcomes take a similar form to that for the primary outcome, and where outcomes are not  
2 binary, analysis will be using the generalized linear mixed model. Transformations will be  
3 performed where data are markedly not normally distributed. For the analysis adjusted for  
4 covariates and for the secondary outcomes (unadjusted) multiple imputation methods will be  
5 used if the proportion of missing data is more than about 5%, and this multiple imputation will  
6 also allow for the clustered and temporal nature of the trial. It is not expected that there will be  
7 any missing data in the primary outcome; as it will be assumed that if the outcome is present  
8 then it will be recorded and if it is not recorded we will assume it is absent. This is a standard  
9 and realistic assumption. Results will be presented as adjusted risk ratios with confidence  
10 intervals (CI) and risk differences to allow full appreciation of clinical effect. To allow for the  
11 two primary outcomes, we will follow good practice and adjust for this multiplicity using a  
12 Bonferroni correction and so report 97.5% confidence intervals.

13  
14 For secondary continuous outcomes mean differences will be reported and 99% confidence  
15 intervals for secondary outcomes. We will report latent intra-cluster correlations for all  
16 outcomes, along with 95% confidence intervals. Pre-specified subgroup analysis will be  
17 undertaken on the primary outcome based on women presenting <35 weeks' gestation versus  
18 >35 weeks' gestation; size of unit and final confirmed diagnosis. The stepped wedge trial  
19 design will also allow investigation of treatment effect heterogeneity across clusters and time.  
20 These exploratory analyses will be reported using 99% confidence intervals. Analysis will be  
21 conducted by intention to treat and sites will be considered exposed to the intervention post  
22 randomised cross-over date.

### 23 24 **Health Economic Outcome**

25 The economic evaluation will be informed by a decision analytical model, which will be  
26 designed and constructed for the study to reflect the maternal and fetal pathway and health  
27 states. Employing a decision analytical model allows for the extrapolation of existing data and  
28 the opportunity to systematically synthesise evidence from various sources. Primary data on

1  
2  
3 1 maternal health outcomes will be available from the study with the distribution of EQ-5D-5L &  
4  
5 2 SF-36 questionnaires which will inform the estimation of Quality Adjusted Life Years  
6  
7 3 (QALYs). Neonatal outcomes will be informed by secondary sources. A systematic literature  
8  
9 4 review will be conducted to identify QOL/utilities (or proxies for same) associated with neonate  
10  
11 5 outcomes which will be incorporated into the decision analytical model to estimate QALYs.  
12  
13 6 Primary data on resource utilisation will be collected using the costing questionnaire. The  
14  
15 7 costs and effects of the intervention and comparator will be compared to estimate an  
16  
17 8 incremental cost effectiveness ratio in a Cost Utility Analysis. To address parameter and  
18  
19 9 structural uncertainties, a probabilistic sensitivity analysis (PSA) will be performed.  
20  
21  
22  
23

10

### 11 **Trial Management**

12 Day to day running of the trial will be coordinated by the Trial Management Group (TMG). The  
13  
14 TMG consist of the lead site investigator plus the project manager and the clinical fellow. The  
15  
16 TMG will act on behalf of the Sponsor and will be responsible to the Trial Steering Committee  
17  
18 (TSC) to ensure that all Sponsors' responsibilities are carried out. The TSC is comprised of  
19  
20 all Principal Investigators as well as the TMG, sponsor, HRB and representatives from  
21  
22 Statistics, economics, neonatology, laboratory and a lay person. The role of the TSC is to  
23  
24 provide overall supervision of the trial. In particular, the TSC will concentrate on the progress  
25  
26 of the trial, adherence to the protocol, participant safety and consideration of new information.  
27  
28  
29  
30  
31  
32  
33  
34  
35  
36  
37  
38  
39  
40  
41  
42  
43  
44

20

### 21 **Data Monitoring**

22 To provide protection for study participants an independent data monitoring committee (DMC)  
23  
24 has been appointed for this trial. The DMC comprises of 4 members who are not involved with  
25  
26 any other aspect of the trial. They include an Obstetrician, a neonatologist, a statistician and  
27  
28 a midwife. The DMC met and ratified their charter and have advised that all serious adverse  
29  
30 events such as stillbirth/neonatal death or profound maternal morbidity in the Intervention arm  
31  
32 of the study be reported to them immediately. The DMC will receive regular updates on the  
33  
34 progress of the trial every quarter from the trail management group (TMG). The purpose of  
35  
36  
37  
38  
39  
40  
41  
42  
43  
44  
45  
46  
47  
48  
49  
50  
51  
52  
53  
54  
55  
56  
57  
58  
59  
60

1 these updates is for the DMC to; 1) ensure the quality of data collection 2) ensure that the  
2 intervention is being rolled out according to the randomisation plan 3) monitor balance  
3 between arms to monitor for potential selection biases and 4) ensure PIGF testing is not  
4 overwhelmingly better or worse than no PIGF testing with respect to maternal morbidity with  
5 neonatal morbidity. Once 1500 outcomes are available an interim analysis will be conducted  
6 and reviewed by the DMC. The interim analysis will report on the co-primary outcomes, follow  
7 the same methods as those of the primary analysis, and examine if there is proof beyond  
8 reasonable doubt that one particular intervention is definitely indicated or definitely contra-  
9 indicated in terms of a net difference of a major endpoint. There will be no formal stopping  
10 criteria put in place, but the DMC will be guided by the knowledge that proof beyond  
11 reasonable doubt cannot be specified precisely, but a difference of at least three standard  
12 deviations in an interim analysis of the primary outcome would be consistent with strong level  
13 of evidence. No allowance for this interim analysis has been made in power calculations.  
14 There will be no stopping of the trial for futility as the study will be underpowered to detect  
15 small effects.

## 16 Discussion

17 Based on previous experience during the PELICAN study, an analysis of success criteria and  
18 barriers to our proposed study was conducted. Potential barriers include the overestimation of  
19 (i) identification of eligible women by the research team, (ii) primary outcome event rate (iii)  
20 and retention / attrition i.e. gaining outcomes data on all women included.

21 A recruitment feasibility audit conducted in Cork University Maternity Hospital (CUMH) over  
22 the course of a typical week in July 2016 identified 21 women who would be eligible for  
23 inclusion in the PARROT Ireland study. This would equate to almost 1100 women per annum  
24 in CUMH, approximately 13% of its annual delivery rate. This is in keeping with the quoted  
25 10% incidence of hypertensive disorders of pregnancy (HDP) in the population (42). It is  
26 anticipated that over the 22 month duration of the study across the 7 hospitals approximately

1  
2  
3 1 10,486 women will meet the study inclusion criteria (13% of the combined annual delivery  
4 rate), and of these 4,000 will be recruited into this trial (approximately 38% of those eligible).  
5  
6 2  
7 3 As inclusion in the trial will be optional and require informed consent from participants, not all  
8  
9 4 eligible women in each unit will be included. Projected inclusion rates will be apparent via a  
10  
11 5 dedicated MedSciNet database pre-programmed, available online and contemporaneously  
12  
13 6 updated, allowing prompt action to intervene when not optimal. A conservative requirement of  
14  
15 7 <50% of all eligible women to be recruited in order to reach targets has deliberately been  
16  
17 8 chosen and successful recruitment of the same population in the PELICAN study is  
18  
19 9 reassuring. As with any study we may get a higher or lower incidence of the primary outcome  
20  
21 10 of interest than anticipated. We should get an early indication of this at the interim analysis.  
22  
23  
24 11

25  
26 12 As participation in the trial does not require any extra attendances/input from the participant  
27  
28 13 for the remainder of the pregnancy, it is likely that retention of participants will not be an issue.  
29  
30 14 Similarly, the data outcome to assess for maternal and neonatal morbidity can be readily  
31  
32 15 obtained post-delivery following discharge of the participant from their stored medical records  
33  
34 16 locally at each unit. However, in order to fully examine the health economic outcomes there  
35  
36 17 exists a reliance on the return of completed questionnaires by the participant post-delivery. To  
37  
38 18 minimise attrition rates, the researcher at each site will endeavour to meet with each  
39  
40 19 participant post-delivery prior to their discharge and encourage them to complete the health  
41  
42 20 economic questionnaires. In the PELICAN study only 1% of the cohort were lost to follow up.  
43  
44 21 The risk of incomplete data collection of outcomes in studies such as this is more relevant if  
45  
46 22 women deliver in a different unit to that which they are recruited in to the trial. However, all  
47  
48 23 seven clusters in our trial are large tertiary referral units and patient transfer during pregnancy  
49  
50 24 is rare. We are therefore confident that the likely rate of loss to follow up will be similar and in  
51  
52 25 the order of 1%.

53  
54  
55  
56  
57 26 There are a number of advantages with the use of stepped wedge design. It allows a phased  
58  
59 27 implementation of the intervention, which is preferable when commencement in all clusters  
60

1  
2  
3 1 simultaneously would be challenging. As all clusters ultimately receive the intervention, it  
4  
5 2 increases willingness of the clusters to partake in the trial. We acknowledge that seven  
6  
7 3 clusters is a small number of clusters and this is an important limitation of the study. Mostly  
8  
9 4 this is a limitation because it will mean that the findings have questionable generalisability.  
10  
11 5 But, if these clusters are representative then the findings may still be generalizable in part.  
12  
13 6 The other limitation that seven clusters brings about is questionable internal reliability.  
14  
15 7 However, because all of the clusters receive both the intervention and control condition, the  
16  
17 8 clusters serve as their own controls. Not only does this lessen the impact of chance imbalance  
18  
19 9 but it also increases the power of the study (particularly so when the ICC is large, as is the  
20  
21 10 case here). The study does only have in the region of 80% power and should parameters such  
22  
23 11 as the ICC be very different to that which we have assumed, then it is correct that the study  
24  
25 12 might be underpowered. To ensure that this is properly accounted for at the analysis stage,  
26  
27 13 we will report appropriate CIs around all point estimates, so the impact of any impression is  
28  
29 14 properly reported.

30  
31  
32  
33  
34 15 Another potential limitation worth noting is the slightly different management algorithm for one  
35  
36 16 cluster, Belfast, in the control arm. The Belfast control arm algorithm is taken directly from the  
37  
38 17 NICE Hypertension in Pregnancy guidelines. All other clusters are using an algorithm taken  
39  
40 18 from the HSE Guidelines for Hypertension in Pregnancy. The two are essentially the same  
41  
42 19 except the HSE algorithm also includes a recommendation for a fetal ultrasound in cases  
43  
44 20 where the participant is <34 weeks gestation. It is not anticipated that the difference in these  
45  
46 21 algorithms should have any bearing on the overall trial results. We will conduct a sensitivity  
47  
48 22 analysis with the Belfast site removed and see if the result remains consistent.

49  
50  
51  
52 23 Ideally PIGF testing should be performed for all participants enrolled in the study, with blinding  
53  
54 24 of the result for those in the control arm. This would allow for test performance statistics to be  
55  
56 25 performed. Unfortunately, testing of control participants will not be conducted in our trial, which  
57  
58 26 is a notable limitation of the study.



1  
2  
3 1 The primary aim of the PARROT Ireland trial is to establish the effectiveness of revealed  
4  
5 2 plasma PIGF measurement in reducing maternal morbidity (with assessment of neonatal  
6  
7 3 safety in parallel) in women presenting with suspected pre-eclampsia prior to 37 weeks'  
8  
9 4 gestation. Should the trial show a reduction in maternal morbidity without an increase in  
10  
11 5 neonatal morbidity, or indeed a reduction in neonatal morbidity with no change in maternal  
12  
13 6 morbidity, it would provide a strong argument for its incorporation into routine obstetric  
14  
15 7 practice. The long-term aim of the trial is to demonstrate if PIGF measurement enables  
16  
17 8 appropriate antenatal stratification of women presenting with suspected pre-eclampsia.  
18  
19 9 Avoiding unnecessary hospital admission would be both clinically and economically beneficial.  
20  
21 10 In contrast, those at increased risk of imminent adverse events, identified by an abnormal  
22  
23 11 PIGF result, would have hospital resources re-directed to them. We anticipate that this trial  
24  
25 12 will provide a definitive result on the benefits of PIGF testing which will act to influence  
26  
27 13 international clinical practice.  
28  
29  
30  
31  
32

33 15 A separate RCT, also entitled "PARROT", has completed recruitment in the United Kingdom  
34  
35 16 since the end of 2017. Although recruiting a similar population of women and using the same  
36  
37 17 PIGF platform, the primary outcome measure for the two RCT's is different, with the UK  
38  
39 18 PARROT trial focusing on time from enrolment to diagnosis. Both studies are using the same  
40  
41 19 electronic clinical record forms developed by MedSciNet and thus will have a large cross-over  
42  
43 20 of data. The advantage of having these two similar RCT's conducted almost simultaneously  
44  
45 21 is that robust information on the impact of incorporation of PIGF into clinical care will be  
46  
47 22 generated. In addition the potential exists for a collaborative project such as an individual  
48  
49 23 participant data meta-analyses in the future.  
50

51  
52 24  
53  
54  
55  
56  
57  
58  
59  
60

## Abbreviations

|    |    |                                                                            |
|----|----|----------------------------------------------------------------------------|
| 1  | 2  | ALT: Alanine Aminotransferase                                              |
| 2  | 3  | AST: Aspartate Aminotransferase                                            |
| 3  | 4  | CAC: cluster-auto correlations                                             |
| 4  | 5  | CI: Confidence Interval                                                    |
| 5  | 6  | CNS: Central Nervous System                                                |
| 6  | 7  | CSF: Cerebrospinal Fluid                                                   |
| 7  | 8  | DBP: Diastolic Blood Pressure                                              |
| 8  | 9  | EC: Ethics Committee                                                       |
| 9  | 10 | eCRF: Electronic Clinical Report Form                                      |
| 10 | 11 | Flt-1: fms-like tyrosine kinase 1                                          |
| 11 | 12 | GCS: Glasgow Coma Scale                                                    |
| 12 | 13 | HDP: Hypertensive Disorder of Pregnancy                                    |
| 13 | 14 | HSE: Health Service Executive                                              |
| 14 | 15 | ICC: Intraclass Correlation Coefficient                                    |
| 15 | 16 | INFANT: The Irish Centre for Fetal and Neonatal Translational Research     |
| 16 | 17 | NICE: National Institute for Clinical Excellence                           |
| 17 | 18 | NICU: Neonatal Intensive Care Unit                                         |
| 18 | 19 | NNU: Neonatal Unit                                                         |
| 19 | 20 | PARROT: Placental growth factor in Assessment of women with suspected pre- |
| 20 | 21 | eclampsia to Reduce maternal morbidity: a Stepped Wedge Cluster            |
| 21 | 22 | Randomised Control Trial                                                   |
| 22 | 23 | PIL: Patient Information Leaflet                                           |
| 23 | 24 | PIGF: Placental Growth Factor                                              |
| 24 | 25 | PSA: Probabilistic Sensitivity Analysis                                    |
| 25 | 26 | QALY: Quality Adjusted life year                                           |
| 26 | 27 | QoL: Quality of Life                                                       |
| 27 | 28 | RCT: Randomised Controlled Trial                                           |
| 28 | 29 | SBP: Systolic Blood Pressure                                               |
| 29 | 30 | sFlt-1: soluble fms-like tyrosine kinase 1                                 |
| 30 | 31 | VEGF: Vascular endothelial growth factor                                   |

## 1 **Declarations**

### 2 **Ethics approval and consent to participate**

3 The trial is being conducted in accordance with ethical principles that have their origin in the  
4 Declaration of Helsinki and are consistent with Good Clinical Practice and applicable  
5 regulatory requirements. The local ethics committee at each participating site has reviewed  
6 the trial protocol, including the patient information and informed consent form, and full ethical  
7 approval granted. Each eligible woman identified is required to give written informed consent  
8 prior to her inclusion in the trial. A GCP trained researcher at the local site obtains this consent.

9 Clinical Research Ethics Committee Cork: ECM 3 (h) 08/11/16

10 University College Hospital Galway EC: Ref 50/12

11 Coombe Womens & Infants University Hospital EC: Study No 20-2016

12 National Maternity Hospital EC: EC 20.2016

13 University Hospital Limerick EC: Ref: 68/16

14 Health Research Authority (Belfast): 16/WM/0484

15 Rotunda Hospital EC: REC-2016-020..

16

### 17 **Dissemination**

18 The success of the trial will be dependent entirely upon the collaboration of clinicians in the  
19 participating hospitals and those who hold key responsibility for the trial. Hence, the credit for  
20 the study will be assigned to the key collaborator(s) from a participating site as it is crucial that  
21 those taking credit for the work have actually carried it out. The results of the trial will be  
22 reported first to trial collaborators. The results from the PARROT Ireland trial will be published  
23 in an established peer reviewed journal. At least one publication of the main results will be  
24 made. Links to the publication will be provided in all applicable trial registers. Dissemination  
25 of results to participants will take place via the media, trial website and relevant participant  
26 organisations. Collaborating investigators will play a vital role in disseminating the results to  
27 colleagues and participants.

## 1 **Figure Legends**

2 *Figure 1; Stepped Wedge Cluster Randomised Design for PARROT Ireland*

3 *Figure 2; Trial Schematic for PARROT Ireland*

4 *Figure 3a; Management Algorithm for Control arm based on HSE guidelines for*  
5 *PARROT Ireland*

6 *Figure 3b; Management Algorithm for Control arm based on NICE guidelines for*  
7 *PARROT Ireland*

8 *Figure 4; Suggested Management Algorithm for Intervention for PARROT Ireland*

9 *Figure 5; Power Curve for PARROT Ireland for Maternal Adverse Outcomes*

10 *Figure 6; Power Curve for PARROT Ireland for Neonatal Adverse Outcomes*

11

## 12 **Availability of data and material**

13 The dataset generated from this study is saved onto a secure electronic database and after  
14 close of the study will be archived in line with GCP regulations. The anonymised completed  
15 dataset will be available from the chief investigator of the trial upon reasonable request.

16

## 17 **Competing interests**

18 The authors declare that they have no competing interests.

19

## 20 **Funding & Trial Sponsor**

21 The PARROT Ireland trial is funded by the Health Research Board Mother and Baby Clinical  
22 Trial Network Ireland (HRB CTN-2014-010). The trial is sponsored by University College Cork,  
23 Ireland. Neither the funders nor trial sponsor had a role in the design of the study and will not  
24 have any role in analyses, interpretation of the data, or decision to submit results.

25

26

27

28

29

30

## 1 **Authors' contributions**

2 All authors (DHR, KH, FB, AC, DD, AH, FM, JM, DM, AK, BM, AM, ED, KO'D & LK) contributed  
3 to the overall study design and specific methodologies. LK conceived and designed the study  
4 with DD. LK and DHR produced the detailed protocol, with input from all authors. DHR drafted  
5 the manuscript with assistance from KH, KOD and LK. All authors have critically read,  
6 contributed with inputs and revisions and approved the final manuscript.

## 8 **Acknowledgements**

9 The authors would like to thank PARROT Ireland participants and the associated maternity  
10 units and staff for their support and involvement in this study.

## References

1. Sibai B, Dekker G, Kupferminc M. Pre-eclampsia. *Lancet*. 2005;365(9461):785-99.
2. Meyer NL, Mercer BM, Friedman SA, Sibai BM. Urinary dipstick protein: a poor predictor of absent or severe proteinuria. *American journal of obstetrics and gynecology*. 1994;170(1 Pt 1):137-41.
3. Waugh JJ, Bell SC, Kilby MD, Blackwell CN, Seed P, Shennan AH, et al. Optimal bedside urinalysis for the detection of proteinuria in hypertensive pregnancy: a study of diagnostic accuracy. *BJOG : an international journal of obstetrics and gynaecology*. 2005;112(4):412-7.
4. Kuo VS, Koumantakis G, Gallery ED. Proteinuria and its assessment in normal and hypertensive pregnancy. *American journal of obstetrics and gynecology*. 1992;167(3):723-8.
5. Villar J, Repke J, Markush L, Calvert W, Rhoads G. The measuring of blood pressure during pregnancy. *American journal of obstetrics and gynecology*. 1989;161(4):1019-24.
6. ACOG practice bulletin. Diagnosis and management of preeclampsia and eclampsia. Number 33, January 2002. *Obstetrics and gynecology*. 2002;99(1):159-67.
7. Meads CA, Cnossen JS, Meher S, Juarez-Garcia A, ter Riet G, Duley L, et al. Methods of prediction and prevention of pre-eclampsia: systematic reviews of accuracy and effectiveness literature with economic modelling. *Health Technology Assessment*. 2008;12(6):1-+.
8. Maglione D, Guerriero V, Viglietto G, Delli-Bovi P, Persico MG. Isolation of a human placenta cDNA coding for a protein related to the vascular permeability factor. *Proceedings of the National Academy of Sciences*. 1991;88(20):9267-71.
9. De Vries C, Escobedo JA, Ueno H, Houck K, Ferrara N, Williams LT. The fms-like tyrosine kinase, a receptor for vascular endothelial growth factor. *Science*. 1992;255(5047):989-91.
10. Kanno S, Oda N, Abe M, Terai Y, Ito M, Shitara K, et al. Roles of two VEGF receptors, Flt-1 and KDR, in the signal transduction of VEGF effects in human vascular endothelial cells. *Oncogene*. 2000;19(17):2138-46.
11. Hayman R, Brockelsby J, Kenny L, Baker P. Preeclampsia: The endothelium, circulating factor(s) and vascular endothelial growth factor. *Journal of the Society for Gynecologic Investigation*. 1999;6(1):3-10.
12. Levine RJ, Maynard SE, Qian C, Lim KH, England LJ, Yu KF, et al. Circulating Angiogenic Factors and the Risk of Preeclampsia. *New England Journal of Medicine*. 2004;350(7):672-83.
13. Chappell LC, Duckworth S, Seed PT, Griffin M, Myers J, Mackillop L, et al. Diagnostic Accuracy of Placental Growth Factor in Women With Suspected Preeclampsia A Prospective Multicenter Study. *Circulation*. 2013;128(19):2121-31.
14. Zeisler H, Llurba E, Chantraine F, Vatish M, Staff AC, Sennström M, et al. Predictive Value of the sFlt-1:PIGF Ratio in Women with Suspected Preeclampsia. *New England Journal of Medicine*. 2016;374(1):13-22.
15. Zeisler H, Llurba E, Chantraine F, Vatish M, Staff AC, Sennstrom M, et al. Predictive Value of the sFlt-1:PIGF Ratio in Women with Suspected Preeclampsia. *New England Journal of Medicine*. 2016;374(1):13-22.
16. PIGF-based testing to help diagnose suspected pre-eclampsia (Triage PIGF test, Elecsys immunoassay sFlt-1/PIGF ratio, DELFIA Xpress PIGF 1-2-3 test, and BRAHMS sFlt-1 Kryptor/BRAHMS PIGF plus Kryptor PE ra [cited May 2016]. *Diagnostics guidance [DG23]* Published date: May 2016:[Available from: <https://www.nice.org.uk/guidance/dg23/chapter/1-Recommendations>.
17. Hemming K, Haines TP, Chilton PJ, Girling AJ, Lilford RJ. The stepped wedge cluster randomised trial: rationale, design, analysis, and reporting. *BMJ : British Medical Journal*. 2015;350.
18. Bland JM. Cluster randomised trials in the medical literature: two bibliometric surveys. *BMC medical research methodology*. 2004;4:21-.
19. Brown CA, Lilford RJ. The stepped wedge trial design: a systematic review. *BMC medical research methodology*. 2006;6:54-.

- 1 20. Stolberg HO, Norman G, Trop I. Randomized controlled trials. *American Journal of*
- 2 *Roentgenology*. 2004;183(6):1539-44.
- 3 21. GCP. ICH HARMONISED TRIPARTITE GUIDELINE, GUIDELINE FOR GOOD CLINICAL PRACTICE
- 4 E6(R1) 1996. Available from:
- 5 [https://www.ich.org/fileadmin/Public\\_Web\\_Site/ICH\\_Products/Guidelines/Efficacy/E6/E6\\_R1\\_Guideline.pdf](https://www.ich.org/fileadmin/Public_Web_Site/ICH_Products/Guidelines/Efficacy/E6/E6_R1_Guideline.pdf).
- 6
- 7 22. HSE. THE MANAGEMENT OF HYPERTENSION IN PREGNANCY. 2016. p. 1-32.
- 8 23. NICE. Hypertension in Pregnancy 2010. Available from:
- 9 <https://www.nice.org.uk/guidance/cg107>.
- 10 24. Cantwell R, Clutton-Brock T, Cooper G, Dawson A, Drife J, Garrod D, et al. Saving Mothers' Lives: Reviewing maternal deaths to make motherhood safer: 2006-2008. The Eighth Report of the Confidential Enquiries into Maternal Deaths in the United Kingdom. *BJOG : an international journal of obstetrics and gynaecology*. 2011;118 Suppl 1:1-203.
- 11 25. Schutte JM, Schuitemaker NWE, Van Roosmalen J, Steegers EAP, Dutch Maternal Mortality C. Substandard care in maternal mortality due to hypertensive disease in pregnancy in the Netherlands. *BJOG: An International Journal of Obstetrics & Gynaecology*. 2008;115(6):732-6.
- 12 26. Martin Jr JN, Thigpen BD, Moore RC, Rose CH, Cushman J, May W. Stroke and severe preeclampsia and eclampsia: A paradigm shift focusing on systolic blood pressure. *Obstetrics and gynecology*. 2005;105(2):246-54.
- 13 27. Sharp A, Chappell L, Dekker G, Pelletier S, Garnier Y, Zeren O, et al. OP 2 Placental growth factor informed management of suspected pre-eclampsia and/or fetal growth restriction – The MAPPLE cohort study. *Pregnancy Hypertension: An International Journal of Women's Cardiovascular Health*. 2017;9(Supplement C):9-10.
- 14 28. EQ-5D. Available from: [www.euroqol.org](http://www.euroqol.org)
- 15 29. SF 6D. Available from: <https://www.sheffield.ac.uk/scharr/sections/heds/mvh/sf-6d>
- 16
- 17 30. EuroQol--a new facility for the measurement of health-related quality of life. *Health policy (Amsterdam, Netherlands)*. 1990;16(3):199-208.
- 18 31. Ware JE, Jr., Sherbourne CD. The MOS 36-item short-form health survey (SF-36). I. Conceptual framework and item selection. *Medical care*. 1992;30(6):473-83.
- 19 32. Brazier J, Usherwood T, Harper R, Thomas K. Deriving a preference-based single index from the UK SF-36 Health Survey. *Journal of clinical epidemiology*. 1998;51(11):1115-28.
- 20 33. Chappell LC, Duckworth S, Seed PT, Griffin M, Myers J, Mackillop L, et al. Diagnostic Accuracy of Placental Growth Factor in Women With Suspected Preeclampsia A Prospective Multicenter Study. *Circulation*. 2013;128(19):2121-31.
- 21 34. Martin J, Girling A, Nirantharakumar K, Ryan R, Marshall T, Hemming K. Intra-cluster and inter-period correlation coefficients for cross-sectional cluster randomised controlled trials for type-2 diabetes in UK primary care. *Trials*. 2016;17:402.
- 22 35. Hooper R, Bourke L. Cluster randomised trials with repeated cross sections: alternatives to parallel group designs. *BMJ : British Medical Journal*. 2015;350.
- 23 36. Hemming K. Available from: <https://clusterrcts.shinyapps.io/rshinyapp/>.
- 24 37. Campbell MK, Fayers PM, Grimshaw JM. Determinants of the intracluster correlation coefficient in cluster randomized trials: the case of implementation research. *Clinical trials (London, England)*. 2005;2(2):99-107.
- 25 38. Hemming K, Taljaard M. Sample size calculations for stepped wedge and cluster randomised trials: a unified approach. *Journal of clinical epidemiology*. 2016;69:137-46.
- 26 39. Hemming K, Eldridge S, Forbes G, Weijer C, Taljaard M. How to design efficient cluster randomised trials. *Bmj*. 2017;358:j3064.
- 27 40. Hemming K, Taljaard M, Forbes A. Analysis of cluster randomised stepped wedge trials with repeated cross-sectional samples. *Trials*. 2017;18:101.

- 1  
2  
3 1 41. Zou GY. A modified Poisson regression approach to prospective studies with binary data.  
4 2 American Journal of Epidemiology. 2004;159(7):702-6.  
5 3 42. Duley L. The Global Impact of Pre-eclampsia and Eclampsia. Seminars in Perinatology.  
6 4 2009;33(3):130-7.  
7  
8 5  
9  
10  
11  
12  
13  
14  
15  
16  
17  
18  
19  
20  
21  
22  
23  
24  
25  
26  
27  
28  
29  
30  
31  
32  
33  
34  
35  
36  
37  
38  
39  
40  
41  
42  
43  
44  
45  
46  
47  
48  
49  
50  
51  
52  
53  
54  
55  
56  
57  
58  
59  
60

For peer review only



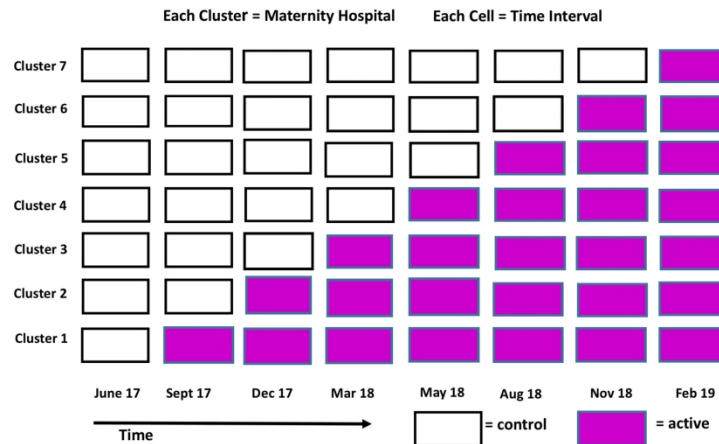

Figure 1; Stepped Wedge Cluster Randomised Design for PARROT Ireland

Figure 1; Stepped Wedge Cluster Randomised Design for PARROT Ireland

297x209mm (300 x 300 DPI)

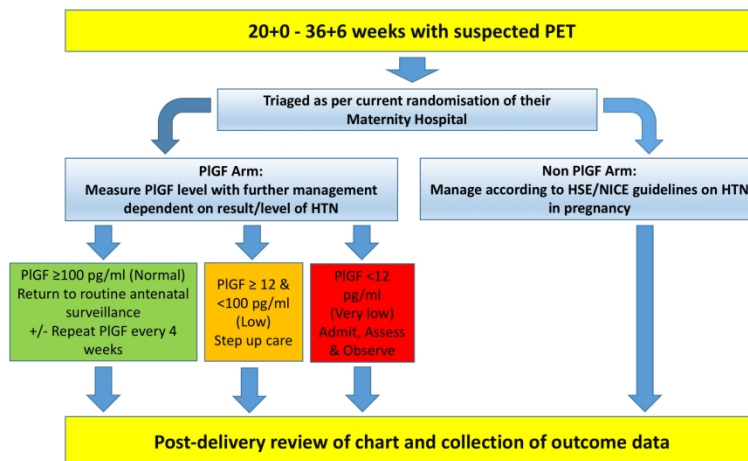

Figure 2; Trial Schematic for PARROT Ireland

Figure 2; Trial Schematic for PARROT Ireland

297x209mm (300 x 300 DPI)

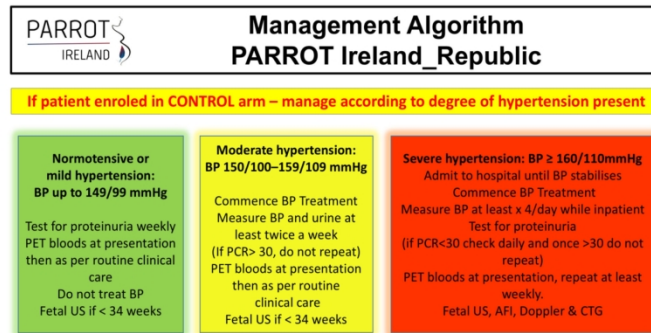

Figure 3a; Management Algorithm for Control arm based on HSE guidelines for PARROT Ireland

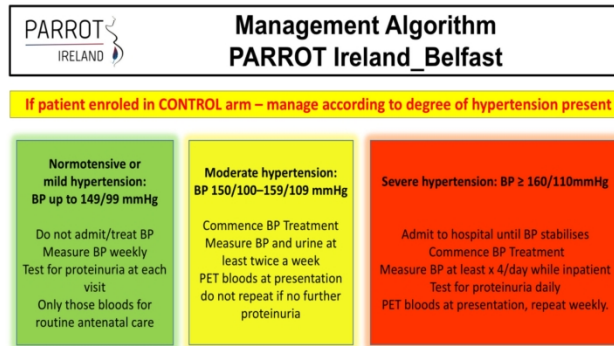

Figure 3b; Management Algorithm for Control arm based on NICE guidelines for PARROT Ireland

35  
36  
37  
38  
39  
40  
41  
42  
43  
44  
45  
46  
47  
48  
49  
50  
51  
52  
53  
54  
55  
56  
57  
58  
59  
60

Figure 3a; Management Algorithm for Control arm based on HSE guidelines for PARROT Ireland  
Figure 3b; Management Algorithm for Control arm based on NICE guidelines for PARROT Ireland

209x297mm (300 x 300 DPI)

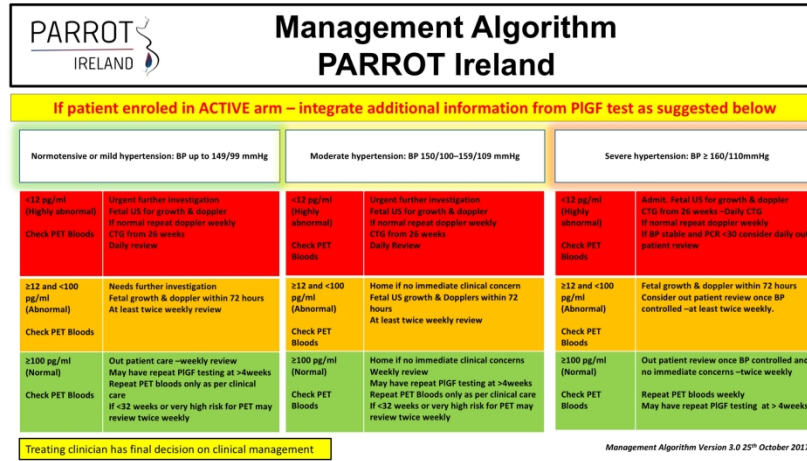

Figure 4; Suggested Management Algorithm for Intervention for PARROT Ireland

Figure 4; Suggested Management Algorithm for Intervention for PARROT Ireland

297x209mm (300 x 300 DPI)

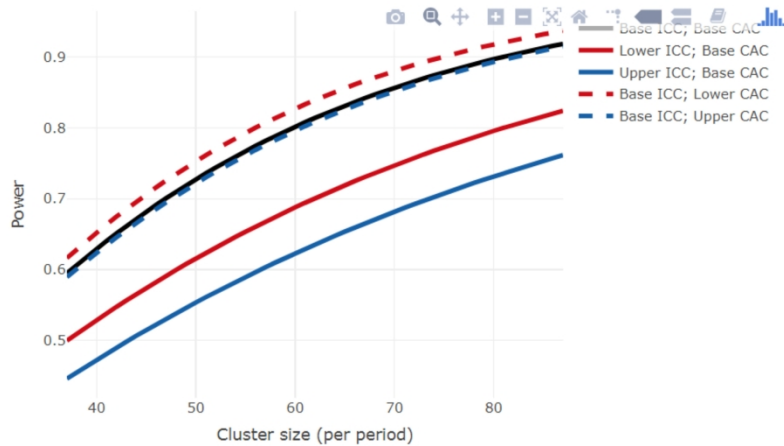

Figure 5; Power Curve for PARROT Ireland for Maternal Adverse Outcomes

Figure 5; Power Curve for PARROT Ireland for Maternal Adverse Outcomes

Caption: Calculation assumes a stepped wedge design with 7 clusters randomised to 7 sequences (8 cluster-periods); a cross-sectional design; Base-case ICC is 0.001; lower ICC is 0.005; upper ICC is 0.01; base-case CAC is 0.8; lower CAC is 0.64; upper CAC is 0.96. Proportion under the control condition is 0.35 and under the intervention condition is 0.28; significance level is 0.025 (see text for justification) and test is two sided. Assumes large sample normal approximations.

297x209mm (300 x 300 DPI)

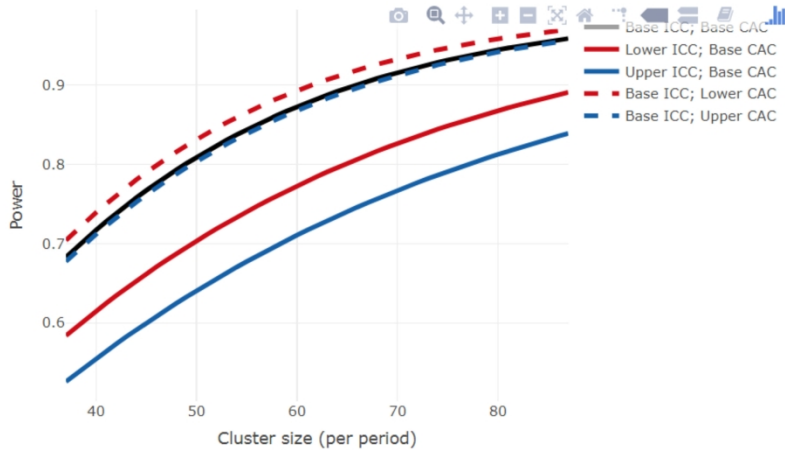

Figure 6: Power Curve for PARROT Ireland for Neonatal Adverse Outcomes

Figure 6: Power Curve for PARROT Ireland for Neonatal Adverse Outcomes

Caption: Calculation assumes a stepped wedge design with 7 clusters randomised to 7 sequences (8 cluster-periods); a cross-sectional design; Base-case ICC is 0.001; lower ICC is 0.005; upper ICC is 0.01; base-case CAC is 0.8; lower CAC is 0.64; upper CAC is 0.96. Proportion under the control condition is 0.1 and under the intervention condition is 0.155; significance level is 0.025 (see text for justification) and test is two sided. Assumes large sample normal approximations.

297x209mm (300 x 300 DPI)

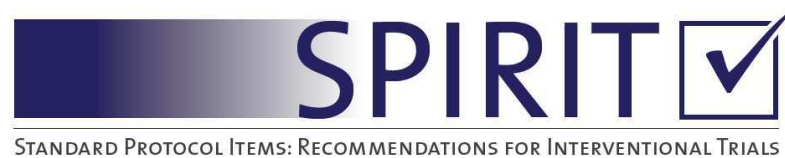

SPIRIT 2013 Checklist: Recommended items to address in a clinical trial protocol and related documents\*

| Section/item                      | Item No | Description                                                                                                                                                                                                                                                                              | Addressed on page number      |
|-----------------------------------|---------|------------------------------------------------------------------------------------------------------------------------------------------------------------------------------------------------------------------------------------------------------------------------------------------|-------------------------------|
| <b>Administrative information</b> |         |                                                                                                                                                                                                                                                                                          |                               |
| Title                             | 1       | Descriptive title identifying the study design, population, interventions, and, if applicable, trial acronym                                                                                                                                                                             | <u>1</u>                      |
| Trial registration                | 2a      | Trial identifier and registry name. If not yet registered, name of intended registry                                                                                                                                                                                                     | <u>1</u>                      |
|                                   | 2b      | All items from the World Health Organization Trial Registration Data Set                                                                                                                                                                                                                 | <u>Supplementary Material</u> |
| Protocol version                  | 3       | Date and version identifier                                                                                                                                                                                                                                                              | <u>1</u>                      |
| Funding                           | 4       | Sources and types of financial, material, and other support                                                                                                                                                                                                                              | <u>25</u>                     |
| Roles and responsibilities        | 5a      | Names, affiliations, and roles of protocol contributors                                                                                                                                                                                                                                  | <u>1-2, 25</u>                |
|                                   | 5b      | Name and contact information for the trial sponsor                                                                                                                                                                                                                                       | <u>25</u>                     |
|                                   | 5c      | Role of study sponsor and funders, if any, in study design; collection, management, analysis, and interpretation of data; writing of the report; and the decision to submit the report for publication, including whether they will have ultimate authority over any of these activities | <u>25</u>                     |

|    |                                                           |                                                                                                                                                                                                                                                                  |              |
|----|-----------------------------------------------------------|------------------------------------------------------------------------------------------------------------------------------------------------------------------------------------------------------------------------------------------------------------------|--------------|
| 1  |                                                           |                                                                                                                                                                                                                                                                  |              |
| 2  |                                                           |                                                                                                                                                                                                                                                                  |              |
| 3  | 5d                                                        | Composition, roles, and responsibilities of the coordinating centre, steering committee, endpoint adjudication committee, data management team, and other individuals or groups overseeing the trial, if applicable (see Item 21a for data monitoring committee) | <u>19</u>    |
| 4  |                                                           |                                                                                                                                                                                                                                                                  |              |
| 5  |                                                           |                                                                                                                                                                                                                                                                  |              |
| 6  |                                                           |                                                                                                                                                                                                                                                                  |              |
| 7  |                                                           |                                                                                                                                                                                                                                                                  |              |
| 8  |                                                           |                                                                                                                                                                                                                                                                  |              |
| 9  |                                                           |                                                                                                                                                                                                                                                                  |              |
| 10 |                                                           |                                                                                                                                                                                                                                                                  |              |
| 11 | <b>Introduction</b>                                       |                                                                                                                                                                                                                                                                  |              |
| 12 |                                                           |                                                                                                                                                                                                                                                                  |              |
| 13 | Background and rationale                                  | 6a Description of research question and justification for undertaking the trial, including summary of relevant studies (published and unpublished) examining benefits and harms for each intervention                                                            | <u>5-7</u>   |
| 14 |                                                           |                                                                                                                                                                                                                                                                  |              |
| 15 |                                                           |                                                                                                                                                                                                                                                                  |              |
| 16 |                                                           | 6b Explanation for choice of comparators                                                                                                                                                                                                                         | <u>10-11</u> |
| 17 | Objectives                                                | 7 Specific objectives or hypotheses                                                                                                                                                                                                                              | <u>7</u>     |
| 18 |                                                           |                                                                                                                                                                                                                                                                  |              |
| 19 | Trial design                                              | 8 Description of trial design including type of trial (eg, parallel group, crossover, factorial, single group), allocation ratio, and framework (eg, superiority, equivalence, noninferiority, exploratory)                                                      | <u>8</u>     |
| 20 |                                                           |                                                                                                                                                                                                                                                                  |              |
| 21 |                                                           |                                                                                                                                                                                                                                                                  |              |
| 22 |                                                           |                                                                                                                                                                                                                                                                  |              |
| 23 | <b>Methods: Participants, interventions, and outcomes</b> |                                                                                                                                                                                                                                                                  |              |
| 24 |                                                           |                                                                                                                                                                                                                                                                  |              |
| 25 | Study setting                                             | 9 Description of study settings (eg, community clinic, academic hospital) and list of countries where data will be collected. Reference to where list of study sites can be obtained                                                                             | <u>9</u>     |
| 26 |                                                           |                                                                                                                                                                                                                                                                  |              |
| 27 |                                                           |                                                                                                                                                                                                                                                                  |              |
| 28 | Eligibility criteria                                      | 10 Inclusion and exclusion criteria for participants. If applicable, eligibility criteria for study centres and individuals who will perform the interventions (eg, surgeons, psychotherapists)                                                                  | <u>9-10</u>  |
| 29 |                                                           |                                                                                                                                                                                                                                                                  |              |
| 30 |                                                           |                                                                                                                                                                                                                                                                  |              |
| 31 | Interventions                                             | 11a Interventions for each group with sufficient detail to allow replication, including how and when they will be administered                                                                                                                                   | <u>10-11</u> |
| 32 |                                                           |                                                                                                                                                                                                                                                                  |              |
| 33 |                                                           |                                                                                                                                                                                                                                                                  |              |
| 34 |                                                           | 11b Criteria for discontinuing or modifying allocated interventions for a given trial participant (eg, drug dose change in response to harms, participant request, or improving/worsening disease)                                                               | <u>10-11</u> |
| 35 |                                                           |                                                                                                                                                                                                                                                                  |              |
| 36 |                                                           |                                                                                                                                                                                                                                                                  |              |
| 37 |                                                           | 11c Strategies to improve adherence to intervention protocols, and any procedures for monitoring adherence (eg, drug tablet return, laboratory tests)                                                                                                            | <u>10-11</u> |
| 38 |                                                           |                                                                                                                                                                                                                                                                  |              |
| 39 |                                                           |                                                                                                                                                                                                                                                                  |              |
| 40 |                                                           | 11d Relevant concomitant care and interventions that are permitted or prohibited during the trial                                                                                                                                                                | <u>10-11</u> |
| 41 |                                                           |                                                                                                                                                                                                                                                                  |              |
| 42 |                                                           |                                                                                                                                                                                                                                                                  |              |
| 43 |                                                           |                                                                                                                                                                                                                                                                  |              |
| 44 |                                                           |                                                                                                                                                                                                                                                                  |              |
| 45 |                                                           |                                                                                                                                                                                                                                                                  |              |
| 46 |                                                           |                                                                                                                                                                                                                                                                  |              |
| 47 |                                                           |                                                                                                                                                                                                                                                                  |              |



1  
2  
3  
4  
5  
6  
7  
8  
9  
10  
11  
12  
13  
14  
15  
16  
17  
18  
19  
20  
21  
22  
23  
24  
25  
26  
27  
28  
29  
30  
31  
32  
33  
34  
35  
36  
37  
38  
39  
40  
41  
42  
43  
44  
45  
46  
47

|                      |    |                                                                                                                                                                                                                                                                                                                                                                                |              |
|----------------------|----|--------------------------------------------------------------------------------------------------------------------------------------------------------------------------------------------------------------------------------------------------------------------------------------------------------------------------------------------------------------------------------|--------------|
| Outcomes             | 12 | Primary, secondary, and other outcomes, including the specific measurement variable (eg, systolic blood pressure), analysis metric (eg, change from baseline, final value, time to event), method of aggregation (eg, median, proportion), and time point for each outcome. Explanation of the clinical relevance of chosen efficacy and harm outcomes is strongly recommended | <u>12-14</u> |
| Participant timeline | 13 | Time schedule of enrolment, interventions (including any run-ins and washouts), assessments, and visits for participants. A schematic diagram is highly recommended (see Figure)                                                                                                                                                                                               | <u>16</u>    |
| Sample size          | 14 | Estimated number of participants needed to achieve study objectives and how it was determined, including clinical and statistical assumptions supporting any sample size calculations                                                                                                                                                                                          | <u>16</u>    |
| Recruitment          | 15 | Strategies for achieving adequate participant enrolment to reach target sample size                                                                                                                                                                                                                                                                                            | <u>19</u>    |

**Methods: Assignment of interventions (for controlled trials)**

Allocation:

|                                  |     |                                                                                                                                                                                                                                                                                                                                                          |           |
|----------------------------------|-----|----------------------------------------------------------------------------------------------------------------------------------------------------------------------------------------------------------------------------------------------------------------------------------------------------------------------------------------------------------|-----------|
| Sequence generation              | 16a | Method of generating the allocation sequence (eg, computer-generated random numbers), and list of any factors for stratification. To reduce predictability of a random sequence, details of any planned restriction (eg, blocking) should be provided in a separate document that is unavailable to those who enrol participants or assign interventions | <u>10</u> |
| Allocation concealment mechanism | 16b | Mechanism of implementing the allocation sequence (eg, central telephone; sequentially numbered, opaque, sealed envelopes), describing any steps to conceal the sequence until interventions are assigned                                                                                                                                                | <u>10</u> |
| Implementation                   | 16c | Who will generate the allocation sequence, who will enrol participants, and who will assign participants to interventions                                                                                                                                                                                                                                | <u>10</u> |
| Blinding (masking)               | 17a | Who will be blinded after assignment to interventions (eg, trial participants, care providers, outcome assessors, data analysts), and how                                                                                                                                                                                                                | <u>10</u> |
|                                  | 17b | If blinded, circumstances under which unblinding is permissible, and procedure for revealing a participant's allocated intervention during the trial                                                                                                                                                                                                     | <u>10</u> |

**Methods: Data collection, management, and analysis**

|    |                            |     |                                                                                                               |              |
|----|----------------------------|-----|---------------------------------------------------------------------------------------------------------------|--------------|
| 1  |                            |     |                                                                                                               |              |
| 2  |                            |     |                                                                                                               |              |
| 3  | Data collection            | 18a | Plans for assessment and collection of outcome, baseline, and other trial data, including any related         | <u>15</u>    |
| 4  | methods                    |     | processes to promote data quality (eg, duplicate measurements, training of assessors) and a description of    |              |
| 5  |                            |     | study instruments (eg, questionnaires, laboratory tests) along with their reliability and validity, if known. |              |
| 6  |                            |     | Reference to where data collection forms can be found, if not in the protocol                                 |              |
| 7  |                            |     |                                                                                                               |              |
| 8  |                            | 18b | Plans to promote participant retention and complete follow-up, including list of any outcome data to be       | <u>20</u>    |
| 9  |                            |     | collected for participants who discontinue or deviate from intervention protocols                             |              |
| 10 |                            |     |                                                                                                               |              |
| 11 | Data management            | 19  | Plans for data entry, coding, security, and storage, including any related processes to promote data quality  | <u>15</u>    |
| 12 |                            |     | (eg, double data entry; range checks for data values). Reference to where details of data management          |              |
| 13 |                            |     | procedures can be found, if not in the protocol                                                               |              |
| 14 |                            |     |                                                                                                               |              |
| 15 | Statistical methods        | 20a | Statistical methods for analysing primary and secondary outcomes. Reference to where other details of the     | <u>17-18</u> |
| 16 |                            |     | statistical analysis plan can be found, if not in the protocol                                                |              |
| 17 |                            |     |                                                                                                               |              |
| 18 |                            | 20b | Methods for any additional analyses (eg, subgroup and adjusted analyses)                                      | <u>17-18</u> |
| 19 |                            |     |                                                                                                               |              |
| 20 |                            | 20c | Definition of analysis population relating to protocol non-adherence (eg, as randomised analysis), and any    |              |
| 21 |                            |     | statistical methods to handle missing data (eg, multiple imputation)                                          | <u>17-18</u> |
| 22 |                            |     |                                                                                                               |              |
| 23 |                            |     |                                                                                                               |              |
| 24 | <b>Methods: Monitoring</b> |     |                                                                                                               |              |
| 25 |                            |     |                                                                                                               |              |
| 26 | Data monitoring            | 21a | Composition of data monitoring committee (DMC); summary of its role and reporting structure; statement of     | <u>20-21</u> |
| 27 |                            |     | whether it is independent from the sponsor and competing interests; and reference to where further details    |              |
| 28 |                            |     | about its charter can be found, if not in the protocol. Alternatively, an explanation of why a DMC is not     |              |
| 29 |                            |     | needed                                                                                                        |              |
| 30 |                            |     |                                                                                                               |              |
| 31 |                            | 21b | Description of any interim analyses and stopping guidelines, including who will have access to these interim  | <u>20-21</u> |
| 32 |                            |     | results and make the final decision to terminate the trial                                                    |              |
| 33 |                            |     |                                                                                                               |              |
| 34 | Harms                      | 22  | Plans for collecting, assessing, reporting, and managing solicited and spontaneously reported adverse         | <u>20-21</u> |
| 35 |                            |     | events and other unintended effects of trial interventions or trial conduct                                   |              |
| 36 |                            |     |                                                                                                               |              |
| 37 | Auditing                   | 23  | Frequency and procedures for auditing trial conduct, if any, and whether the process will be independent      | <u>20-21</u> |
| 38 |                            |     | from investigators and the sponsor                                                                            |              |
| 39 |                            |     |                                                                                                               |              |
| 40 |                            |     |                                                                                                               |              |
| 41 |                            |     |                                                                                                               |              |
| 42 |                            |     |                                                                                                               |              |
| 43 |                            |     |                                                                                                               |              |
| 44 |                            |     |                                                                                                               |              |
| 45 |                            |     |                                                                                                               |              |
| 46 |                            |     |                                                                                                               |              |
| 47 |                            |     |                                                                                                               |              |

1  
2  
3  
4  
5  
6  
7  
8  
9  
10  
11  
12  
13  
14  
15  
16  
17  
18  
19  
20  
21  
22  
23  
24  
25  
26  
27  
28  
29  
30  
31  
32  
33  
34  
35  
36  
37  
38  
39  
40  
41  
42  
43  
44  
45  
46  
47

**Ethics and dissemination**

|                               |     |                                                                                                                                                                                                                                                                                     |              |
|-------------------------------|-----|-------------------------------------------------------------------------------------------------------------------------------------------------------------------------------------------------------------------------------------------------------------------------------------|--------------|
| Research ethics approval      | 24  | Plans for seeking research ethics committee/institutional review board (REC/IRB) approval                                                                                                                                                                                           | <u>24</u>    |
| Protocol amendments           | 25  | Plans for communicating important protocol modifications (eg, changes to eligibility criteria, outcomes, analyses) to relevant parties (eg, investigators, REC/IRBs, trial participants, trial registries, journals, regulators)                                                    | <u>19</u>    |
| Consent or assent             | 26a | Who will obtain informed consent or assent from potential trial participants or authorised surrogates, and how (see Item 32)                                                                                                                                                        | <u>10-11</u> |
|                               | 26b | Additional consent provisions for collection and use of participant data and biological specimens in ancillary studies, if applicable                                                                                                                                               | <u>11</u>    |
| Confidentiality               | 27  | How personal information about potential and enrolled participants will be collected, shared, and maintained in order to protect confidentiality before, during, and after the trial                                                                                                | <u>15</u>    |
| Declaration of interests      | 28  | Financial and other competing interests for principal investigators for the overall trial and each study site                                                                                                                                                                       | <u>25</u>    |
| Access to data                | 29  | Statement of who will have access to the final trial dataset, and disclosure of contractual agreements that limit such access for investigators                                                                                                                                     | <u>26</u>    |
| Ancillary and post-trial care | 30  | Provisions, if any, for ancillary and post-trial care, and for compensation to those who suffer harm from trial participation                                                                                                                                                       | <u>N/A</u>   |
| Dissemination policy          | 31a | Plans for investigators and sponsor to communicate trial results to participants, healthcare professionals, the public, and other relevant groups (eg, via publication, reporting in results databases, or other data sharing arrangements), including any publication restrictions | <u>25</u>    |
|                               | 31b | Authorship eligibility guidelines and any intended use of professional writers                                                                                                                                                                                                      | <u>25</u>    |
|                               | 31c | Plans, if any, for granting public access to the full protocol, participant-level dataset, and statistical code                                                                                                                                                                     | <u>25</u>    |

**Appendices**

|   |                  |    |                                                                                                           |                      |
|---|------------------|----|-----------------------------------------------------------------------------------------------------------|----------------------|
| 1 |                  |    |                                                                                                           |                      |
| 2 |                  |    |                                                                                                           |                      |
| 3 | Informed consent | 32 | Model consent form and other related documentation given to participants and authorised surrogates        |                      |
| 4 | materials        |    |                                                                                                           | <u>Supplementary</u> |
| 5 |                  |    |                                                                                                           | <u>Material</u>      |
| 6 |                  |    |                                                                                                           |                      |
| 7 | Biological       | 33 | Plans for collection, laboratory evaluation, and storage of biological specimens for genetic or molecular | <u>N/A</u>           |
| 8 | specimens        |    | analysis in the current trial and for future use in ancillary studies, if applicable                      |                      |
| 9 |                  |    |                                                                                                           |                      |

10 \*It is strongly recommended that this checklist be read in conjunction with the SPIRIT 2013 Explanation & Elaboration for important clarification on the items.  
11 Amendments to the protocol should be tracked and dated. The SPIRIT checklist is copyrighted by the SPIRIT Group under the Creative Commons  
12 "[Attribution-NonCommercial-NoDerivs 3.0 Unported](https://creativecommons.org/licenses/by-nc-nd/3.0/)" license.  
13
